# Supplementary material for: Prenatal Diet and Infant Growth From Birth to Age 24 Months
Source: PubMed Central journal article supplement (PMC11582932; doi:10.1001/jamanetworkopen.2024.45771), 2024-11-21

## Supplemental Online Content

Hedderson MM, Schuh HB, Knapp EA, et al; the ECHO Cohort Consortium. Prenatal diet and infant growth from birth to age 24 months. *JAMA Netw Open*. 2024;7(11):e2445771. doi:10.1001/jamanetworkopen.2024.45771

**eTable 1.** Comparison of Analytic Sample and Mother-Child Pairs Excluded from Analysis

**eTable 2.** Description of Dietary Assessments by Cohort

**eTable 3.** Association Between Prenatal Alternative Healthy Eating Index Pregnancy (AHEI-P) Dietary Pattern and Size for Gestational Age at Birth Category

**eTable 4.** Association Between Prenatal Empirical Dietary Inflammatory Pattern (EDIP) and Size for Gestational Age at birth Category and Infant Growth at 6, 12 and 24 Months, by Quartile Of EDIP

**eFigure 1.** Flow Diagram of Analytic Sample

**eFigure 2.** Adjusted Odds Ratios of the Alternative Healthy Eating Index in Pregnancy and Infant Growth at 6, 12 and 24 Months

**eFigure 3.** Adjusted Odds Ratios of the Alternative Healthy Eating Index in Pregnancy and Extremes of Infant Growth at 6, 12 and 24 Months

This supplemental material has been provided by the authors to give readers additional information about their work.

**Supplementary eTable 1.** Comparison of Analytic Sample and Mother-Child Pairs Excluded from Analysis

|                                             | <b>Total Included in Sample</b> | <b>Excluded</b>  |
|---------------------------------------------|---------------------------------|------------------|
| <b>Birthing parent-Child Pairs, N</b>       | 2,854                           | 7,707            |
| <b>Child Characteristics</b>                |                                 |                  |
| <b>Birth year</b>                           |                                 |                  |
| 2007-2011                                   | 952 (33.4%)                     | 2,898 (37.6%)    |
| 2012-2016                                   | 1,275 (44.7%)                   | 3,754 (48.7%)    |
| 2017-2021                                   | 627 (22.0%)                     | 1,055 (13.7%)    |
| <b>Child sex (at birth), female</b>         | 1,390 (48.7%)                   | 3,712 (48.2%)    |
| <b>Child race/ethnicity</b>                 |                                 |                  |
| White                                       | 664 (23.3%)                     | 4,377 (56.8%)    |
| Black                                       | 640 (22.4%)                     | 822 (10.7%)      |
| Asian, Native Hawaiian or Pacific Islander  | 225 (7.9%)                      | 281 (3.6%)       |
| Hispanic                                    | 1,022 (35.8%)                   | 1,185 (15.4%)    |
| Other or multiracial                        | 224 (7.8%)                      | 983 (12.8%)      |
| Missing                                     | 79 (2.8%)                       | 59 (0.8%)        |
| <b>Birthweight (grams)</b>                  | 3325 (3040-3650)                | 3430 (3130-3742) |
| <b>Size at birth</b>                        |                                 |                  |
| Appropriate for gestational age             | 2,294 (80.4%)                   | 5,812 (75.4%)    |
| Small for gestational age                   | 155 (5.4%)                      | 298 (3.9%)       |
| Large for gestational age                   | 404 (14.2%)                     | 1,509 (19.6%)    |
| Missing                                     | <5                              | 88 (1.1%)        |
| <b>Preterm birth</b>                        | 138 (4.8%)                      | 326 (4.2%)       |
| <b>Maternal Characteristics</b>             |                                 |                  |
| <b>Maternal age at delivery</b>             |                                 |                  |
| <25                                         | 586 (20.5%)                     | 1,370 (17.8%)    |
| 25-29                                       | 763 (26.7%)                     | 2,113 (27.4%)    |
| 30-34                                       | 917 (32.1%)                     | 2,531 (32.8%)    |
| 35+                                         | 588 (20.6%)                     | 1,495 (19.4%)    |
| <b>Pre-pregnancy BMI</b>                    |                                 |                  |
| Normal (18.5-24.9, kg/m <sup>2</sup> )      | 1,156 (40.5%)                   | 3,092 (40.1%)    |
| Underweight (<18.5, kg/m <sup>2</sup> )     | 74 (2.6%)                       | 176 (2.3%)       |
| Overweight (25-29.9, kg/m <sup>2</sup> )    | 767 (26.9%)                     | 1,741 (22.6%)    |
| Obese (30+, kg/m <sup>2</sup> )             | 844 (29.6%)                     | 1,724 (22.4%)    |
| Missing                                     | 13 (0.5%)                       | 974 (12.6%)      |
| <b>Maternal educational status, highest</b> |                                 |                  |
| <College degree                             | 1,562 (54.7%)                   | 1,212 (15.7%)    |
| College degree                              | 744 (26.1%)                     | 1,029 (13.4%)    |
| Graduate degree                             | 501 (17.6%)                     | 866 (11.2%)      |
| Missing                                     | 47 (1.6%)                       | 4,600 (59.7%)    |
| <b>Prenatal tobacco/nicotine use</b>        | 135 ( 4.7%)                     | 999 (13.0%)      |
| Missing                                     | <5                              | 655 (8.5%)       |

**Supplemental Table 2. Description of Dietary Assessments by Cohort**

| Cohort | Diet Assessment                                                | 1 <sup>st</sup> Trimester |     |       | 2 <sup>nd</sup> Trimester |      |       | 3 <sup>rd</sup> Trimester |      |       |
|--------|----------------------------------------------------------------|---------------------------|-----|-------|---------------------------|------|-------|---------------------------|------|-------|
|        |                                                                | 24-hr                     | FFQ | Total | 24-hr                     | FFQ  | Total | 24-hr                     | FFQ  | Total |
| 1      | ASA24 <sup>1</sup> (2011)                                      | 48                        | 0   | 48    | 237                       | 0    | 237   | 5                         | 0    | 5     |
| 2      | ASA24 <sup>1</sup> (2016)                                      |                           |     |       | <5                        | 0    | <5    | 13                        | 0    | 13    |
| 3      | Block-Bodnar<br>Questionnaire for Women of<br>Reproductive Age | 0                         | 17  | 17    | 0                         | 12   | 12    |                           |      |       |
| 4      | Block-Bodnar<br>Questionnaire for Women of<br>Reproductive Age | 0                         | 846 | 846   | 0                         | 423  | 423   | 0                         | <5   | <5    |
| 5      | ASA24 <sup>1</sup> (2016)<br>ASA24 <sup>1</sup> (2018)         |                           |     |       | <5                        | 0    | <5    | 237                       | 0    | 237   |
| 6      | Block-Bodnar<br>Questionnaire for Women of<br>Reproductive Age |                           |     |       | 0                         | 689  | 689   | 0                         | 96   | 96    |
| 7      | Block-Bodnar<br>Questionnaire for Women of<br>Reproductive Age |                           |     |       | 0                         | 9    | 9     | 0                         | 8    | 8     |
| 8      | Block-Bodnar<br>Questionnaire for Women of<br>Reproductive Age | 0                         | 24  | 24    | 0                         | 80   | 80    | 0                         | 90   | 90    |
|        | Total                                                          | 48                        | 887 | 935   | <255                      | 1213 | <1468 | 255                       | <200 | <455  |

Supplemental **Table 3.** Association between prenatal Alternative Healthy Eating Index Pregnancy (AHEI-P)<sup>c</sup> dietary pattern and size for gestational age at birth category

|                          | Adjusted Odd ratio (95% CI) <sup>a</sup>                            |
|--------------------------|---------------------------------------------------------------------|
| Size for Gestational Age | High Alternative Healthy Eating Index (AHEI) <sup>c</sup><br>n=2711 |
| Appropriate              | Reference                                                           |
| Small <sup>a</sup>       | 0.86 [0.71,1.04]                                                    |
| Large <sup>b</sup>       | 0.73 [0.49,1.09]                                                    |

<sup>a</sup> Multinomial logistic regression models adjusted for maternal education, child sex, maternal age at delivery, pre-pregnancy Body Mass Index (BMI), child race and ethnicity, prenatal tobacco use, dietary assessment (food frequency questionnaire or 24-hour recall), and trimester of dietary assessment. Robust standard errors clustered on cohort were included in the estimate of the to account for correlation of children within the same cohort.

<sup>b</sup> High AHEI-P was defined as a score >76.3% using the mean of the highest quartile cut-off

<sup>c</sup> using Intergrowth-21st reference less than and not including 10th percentile; b: using Intergrowth-21st reference greater than and not including 90th percentile.

Supplemental **Table 4.** Association between prenatal Empirical Dietary Inflammatory Pattern (EDIP)<sup>a</sup> and size for gestational age at birth category and infant growth at 6, 12 and 24 months, by quartile of EDIP.

|                                               | Birthweight<br>n=2159 |                     |                     |
|-----------------------------------------------|-----------------------|---------------------|---------------------|
| Size for gestational age                      |                       |                     |                     |
| <b>Small for gestational age<sup>b*</sup></b> |                       |                     |                     |
| Most Inflammatory (Q4)                        | REF                   |                     |                     |
| Inflammatory (Q3)                             | 0.90 [ 0.63, 1.30]    |                     |                     |
| Less Inflammatory (Q2)                        | 1.06 [0.67, 1.69]     |                     |                     |
| Least Inflammatory (Q1)                       | 0.83 [0.62, 1.12]     |                     |                     |
| <b>Large for gestational age<sup>c*</sup></b> |                       |                     |                     |
| Most Inflammatory (Q4)                        | REF                   |                     |                     |
| Inflammatory (Q3)                             | 0.89 [0.51, 1.55]     |                     |                     |
| Less Inflammatory (Q2)                        | 0.73 [0.46, 1.17]     |                     |                     |
| Least Inflammatory (Q1)                       | 0.90 [0.71, 1.15]     |                     |                     |
|                                               | 6 months<br>n=1303    | 12 months<br>n=1602 | 24 months<br>n=1115 |
| <b>Slow growth**</b>                          |                       |                     |                     |
| Most Inflammatory (Q4)                        | REF                   | REF                 | REF                 |
| Inflammatory (Q3)                             | 0.88[0.69, 1.11]      | 1.11 [0.94, 1.30]   | 0.91 [0.72, 1.16]   |
| Less Inflammatory (Q2)                        | 0.77 [0.57, 1.03]     | 1.31 [1.01, 1.69]   | 1.23 [0.93, 1.63]   |
| Least Inflammatory (Q1)                       | 0.74 [0.64, 0.86]     | 1.38 [1.12, 1.69]   | 1.14 [ 0.91, 1.44]  |

**Rapid growth\*\***

|                         | REF               | REF               | REF               |
|-------------------------|-------------------|-------------------|-------------------|
| Most Inflammatory (Q4)  |                   |                   |                   |
| Inflammatory (Q3)       | 0.92 [0.67, 1.27] | 0.88 [0.59, 1.33] | 1.01 [0.58, 1.76] |
| Less Inflammatory (Q2)  | 0.87 [0.81, 0.95] | 0.95 [0.83, 1.10] | 1.01 [0.93, 1.10] |
| Least Inflammatory (Q1) | 0.91 [0.78, 1.07] | 1.00 [0.73, 1.38] | 1.12 [0.85, 1.48] |

---

<sup>a</sup> EDIP quartile, mean(SD): Most Inflammatory: 64.7(0.6); Inflammatory 64.0(0.1); Less Inflammatory: 63.8(0.1); Least Inflammatory: 63.5(0.3)

\*Reference is Appropriate for Gestational Age <sup>b</sup>: using Intergrowth-21st reference less than and not including 10th percentile; <sup>c</sup>: using Intergrowth-21st reference greater than and not including 90th percentile. Multinomial logistic regression models adjusted for maternal education, child sex, maternal age at delivery, pre-pregnancy Body Mass Index (BMI), child race and ethnicity, prenatal tobacco use, dietary assessment (food frequency questionnaire or 24-hour recall), and trimester of dietary assessment. Robust standard errors clustered on cohort were included in the estimate of the to account for correlation of children within the same cohort.

\*\*Reference is Appropriate growth defined as a difference in weight-for-length z-score between birth and 6, 12, or 24 months of -0.67 to 0.67.

Supplemental Figure 1.

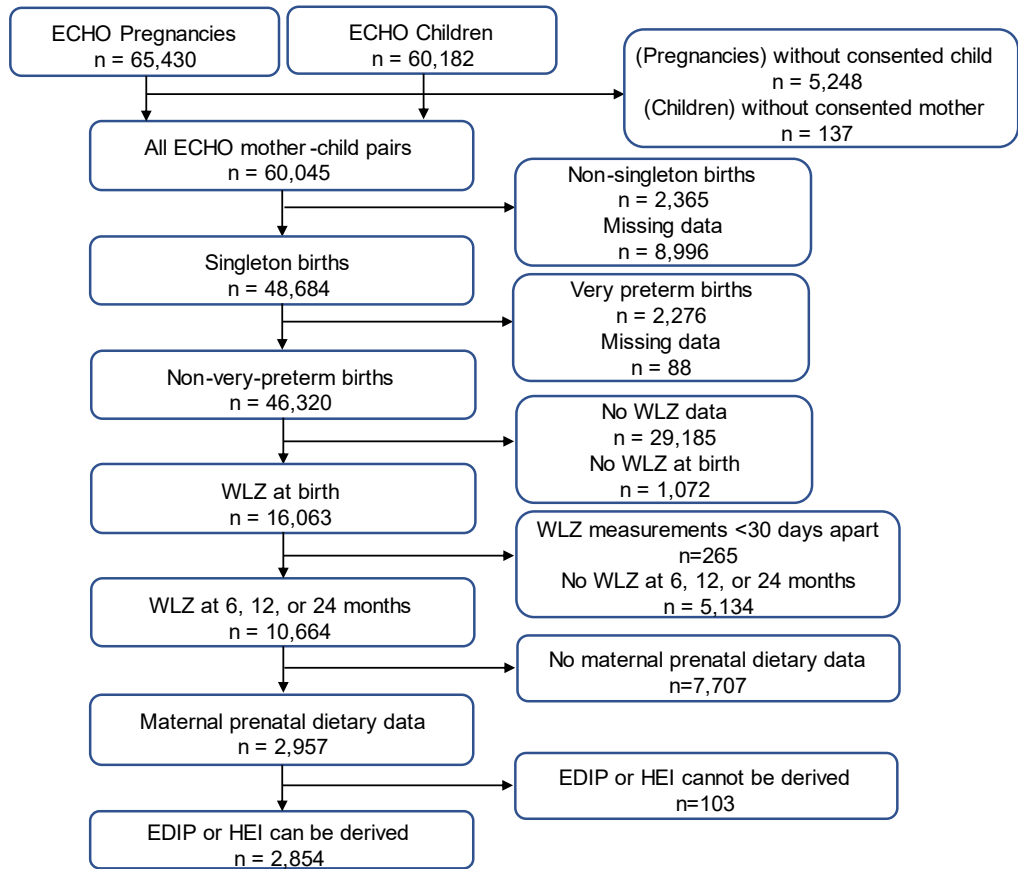

## Supplemental Figure 2.

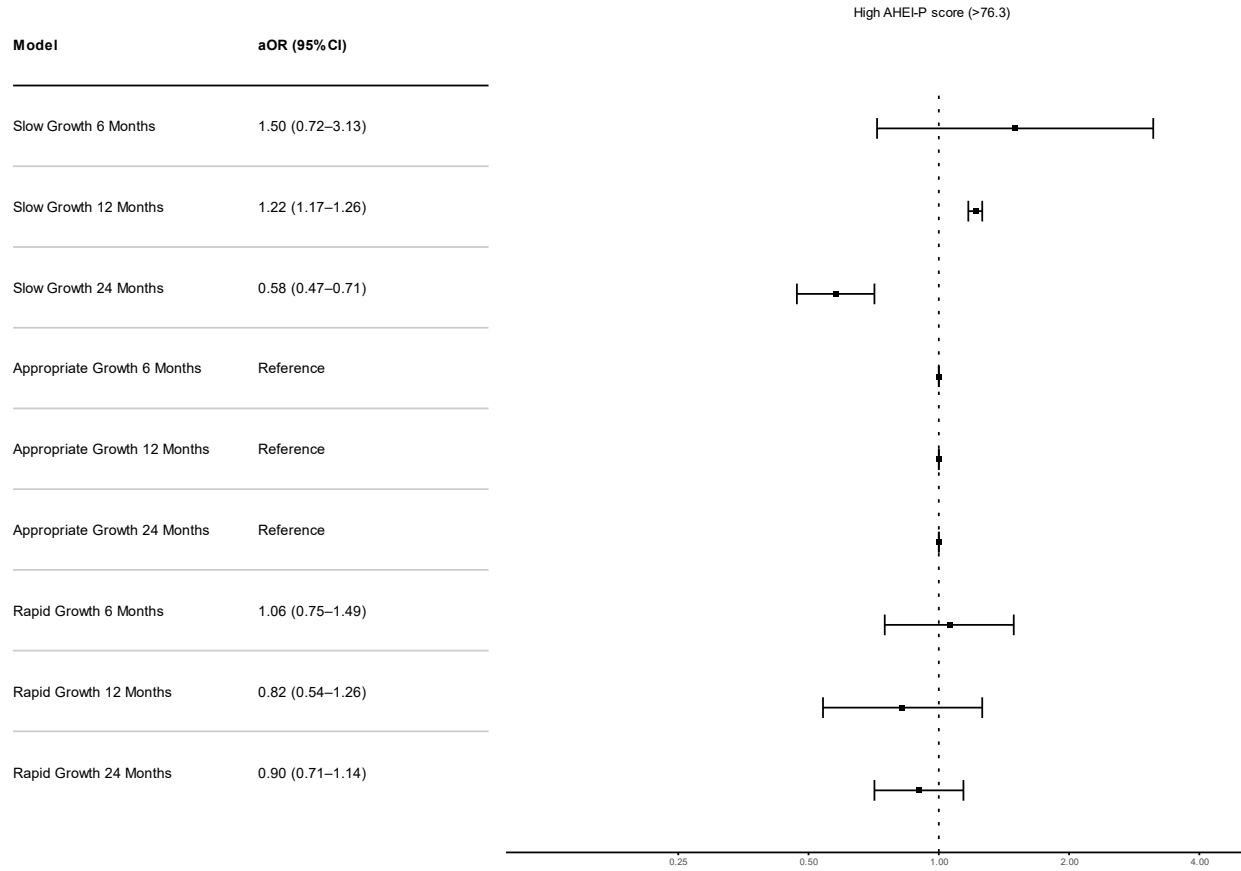

### Supplemental Figure 3.

| Model                            | aOR (95%CI)      |
|----------------------------------|------------------|
| Extremely Slow Growth 6 Months   | 1.59 (0.94–2.70) |
| Extremely Slow Growth 12 Months  | 0.84 (0.48–1.46) |
| Extremely Slow Growth 24 Months  | 0.58 (0.33–0.99) |
| Slow Growth 6 Months             | 1.40 (0.51–3.83) |
| Slow Growth 12 Months            | 1.49 (1.14–1.94) |
| Slow Growth 24 Months            | 0.59 (0.35–1.01) |
| Appropriate Growth 6 Months      | Reference        |
| Appropriate Growth 12 Months     | Reference        |
| Appropriate Growth 24 Months     | Reference        |
| Rapid Growth 6 Months            | 1.16 (1.03–1.31) |
| Rapid Growth 12 Months           | 0.94 (0.89–0.98) |
| Rapid Growth 24 Months           | 1.00 (0.63–1.58) |
| Extremely Rapid Growth 6 Months  | 1.00 (0.62–1.60) |
| Extremely Rapid Growth 12 Months | 0.78 (0.43–1.41) |
| Extremely Rapid Growth 24 Months | 0.86 (0.73–1.00) |

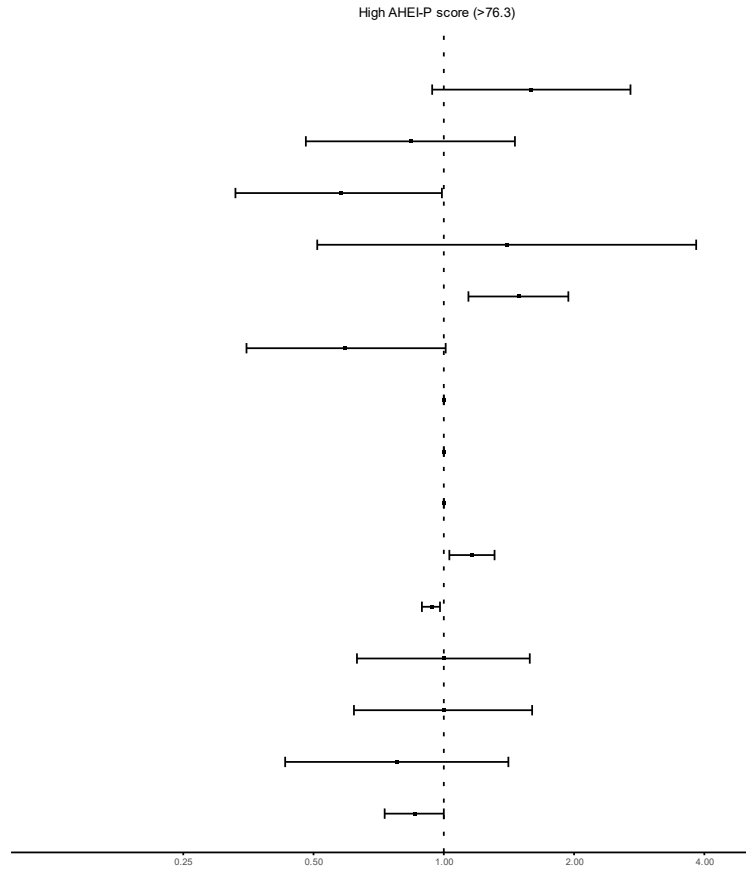

Supplement: jamanetwopen-e2445771-s001.pdf [file jamanetwopen-e2445771-s001.pdf]
