# Supplementary material for: Prenatal Diet and Infant Growth From Birth to Age 24 Months
Source: PubMed Central journal article supplement (PMC11582932; doi:10.1001/jamanetworkopen.2024.45771), 2024-11-21
Supplement: jamanetwopen-e2445771-s002.pdf [file jamanetwopen-e2445771-s002.pdf]

\*First name, last name, and suffix (if applicable) are required and will appear in PubMed.

| <b>*Group Name(s): ECHO Cohort Consortium</b> |                   |                              |                  |                                                                                      |                                             |                                                                             |                                                                                            |
|-----------------------------------------------|-------------------|------------------------------|------------------|--------------------------------------------------------------------------------------|---------------------------------------------|-----------------------------------------------------------------------------|--------------------------------------------------------------------------------------------|
| <b>*First Name and Middle Initial(s)</b>      | <b>*Last Name</b> | <b>*Suffix (eg, Jr, III)</b> | Academic Degrees | Institution                                                                          | Location (city, state/province, country)    | Role or Contribution, eg, chair, principal investigator                     | Group (if more than 1 Group listed in the byline and/or Subgroup (eg, Steering Committee)) |
| P Brian                                       | Smith             |                              | MD, MPH, MHS     | Duke Clinical Research Institute, Duke University School of Medicine                 | Durham, North Carolina, USA                 | ECHO Coordinating Center Principal Investigator                             | U2COD023375 (Coordinating Center)                                                          |
| L Kristin                                     | Newby             |                              | MD, MHS          | Duke Clinical Research Institute, Duke University School of Medicine                 | Durham, North Carolina, USA                 | ECHO Coordinating Center Principal Investigator                             | U2COD023375 (Coordinating Center)                                                          |
| Linda                                         | Adair             |                              | PhD              | Gillings School of Global Public Health, University of North Carolina at Chapel Hill | Chapel Hill, North Carolina, USA            | ECHO Coordinating Center Principal Investigator                             | U2COD023375 (Coordinating Center)                                                          |
| Lisa P.                                       | Jacobson          |                              | ScD              | Johns Hopkins University, Bloomberg School of Public Health                          | Baltimore, Maryland, USA                    | ECHO Data Analysis Center Principal Investigator                            | U24OD023382 (Data Analysis Center)                                                         |
| Diane                                         | Catellier         |                              | DrPH             | Research Triangle Institute                                                          | Research Triangle Park, North Carolina, USA | ECHO Data Analysis Center Principal Investigator                            | U24OD023382 (Data Analysis Center)                                                         |
| Monica                                        | McGrath           |                              | ScD              | Johns Hopkins University, Bloomberg School of Public Health                          | Baltimore, Maryland, USA                    | ECHO Johns Hopkins University Data Analysis Center Director Co-Investigator | U24OD023382 (Data Analysis Center)                                                         |
| Christian                                     | Douglas           |                              | DrPH             | Research Triangle Institute                                                          | Research Triangle Park, North Carolina, USA | ECHO RTI Data Analysis Center Director Co-Investigator                      | U24OD023382 (Data Analysis Center)                                                         |
| Priya                                         | Duggal            |                              | PhD              | Johns Hopkins University, Bloomberg School of Public Health                          | Baltimore, Maryland, USA                    | ECHO Data Analysis Center Genetics Methods Lead, Co-Investigator            | U24OD023382 (Data Analysis Center)                                                         |

## Supplemental Online Content: Nonauthor Collaborators

\*First name, last name, and suffix (if applicable) are required and will appear in PubMed.

| <b>*First Name and Middle Initial(s)</b> | <b>*Last Name</b> | <b>*Suffix (eg, Jr, III)</b> | Academic Degrees | Institution                                                 | Location (city, state/province, country) | Role or Contribution, eg, chair, principal investigator   | Group (if more than 1 Group listed in the byline) and/or Subgroup (eg, Steering Committee)               |
|------------------------------------------|-------------------|------------------------------|------------------|-------------------------------------------------------------|------------------------------------------|-----------------------------------------------------------|----------------------------------------------------------------------------------------------------------|
| Emily                                    | Knapp             |                              | PhD              | Johns Hopkins University, Bloomberg School of Public Health | Baltimore, Maryland, USA                 | ECHO Data Analysis Center Co-Investigator                 | U24OD023382 (Data Analysis Center)                                                                       |
| Amii                                     | Kress             |                              | PhD              | Johns Hopkins University, Bloomberg School of Public Health | Baltimore, Maryland, USA                 | ECHO Data Analysis Center General Methods Co-Investigator | U24OD023382 (Data Analysis Center)                                                                       |
| Courtney K.                              | Blackwell         |                              | PhD              | Feinberg School of Medicine, Northwestern University        | Chicago, Illinois, USA                   | Measurement Core Co-Investigator                          | U24OD023319 with co-funding from the Office of Behavioral and Social Science Research (Measurement Core) |
| Maxwell A.                               | Mansolf           |                              | PhD              | Feinberg School of Medicine, Northwestern University        | Chicago, Illinois, USA                   | Measurement Core Co-Investigator                          | U24OD023319 with co-funding from the Office of Behavioral and Social Science Research (Measurement Core) |
| Jin-Shei                                 | Lai               |                              | PhD              | Feinberg School of Medicine, Northwestern University        | Chicago, Illinois, USA                   | Measurement Core Co-Investigator                          | U24OD023319 with co-funding from the Office of Behavioral and Social Science Research (Measurement Core) |
| Emily                                    | Ho                |                              | PhD              | Feinberg School of Medicine, Northwestern University        | Chicago, Illinois, USA                   | Measurement Core Co-Investigator                          | U24OD023319 with co-funding from the Office of Behavioral and Social Science Research (Measurement Core) |

## Supplemental Online Content: Nonauthor Collaborators

\*First name, last name, and suffix (if applicable) are required and will appear in PubMed.

| *First Name and Middle Initial(s) | *Last Name | *Suffix (eg, Jr, III) | Academic Degrees | Institution                                                                                                   | Location (city, state/province, country) | Role or Contribution, eg, chair, principal investigator | Group (if more than 1 Group listed in the byline) and/or Subgroup (eg, Steering Committee)               |
|-----------------------------------|------------|-----------------------|------------------|---------------------------------------------------------------------------------------------------------------|------------------------------------------|---------------------------------------------------------|----------------------------------------------------------------------------------------------------------|
| David                             | Cella      |                       | PhD              | Feinberg School of Medicine, Northwestern University                                                          | Chicago, Illinois, USA                   | Measurement Core Principal Investigator                 | U24OD023319 with co-funding from the Office of Behavioral and Social Science Research (Measurement Core) |
| Richard                           | Gershon    |                       | PhD              | Feinberg School of Medicine, Northwestern University                                                          | Chicago, Illinois, USA                   | Measurement Core Principal Investigator                 | U24OD023319 with co-funding from the Office of Behavioral and Social Science Research (Measurement Core) |
| Michelle L.                       | Macy       |                       | MD               | Feinberg School of Medicine, Northwestern University and Ann & Robert H. Lurie Children's Hospital of Chicago | Chicago, Illinois, USA                   | Measurement Core Co-Investigator                        | U24OD023319 with co-funding from the Office of Behavioral and Social Science Research (Measurement Core) |
| Suman R.                          | Das        |                       | PhD              | Vanderbilt University Medical Center                                                                          | Nashville, Tennessee, USA                | ECHO Laboratory Core Principal Investigator             | U24OD035523 (Lab Core)                                                                                   |
| Jane E.                           | Freedman   |                       | MD               | Vanderbilt University Medical Center                                                                          | Nashville, Tennessee, USA                | ECHO Laboratory Core Principal Investigator             | U24OD035523 (Lab Core)                                                                                   |
| Simon A.                          | Mallal     |                       | MBBS             | Vanderbilt University Medical Center                                                                          | Nashville, Tennessee, USA                | ECHO Laboratory Core Principal Investigator             | U24OD035523 (Lab Core)                                                                                   |
| John A.                           | McLean     |                       | PhD              | Vanderbilt University                                                                                         | Nashville, Tennessee, USA                | ECHO Laboratory Core Principal Investigator             | U24OD035523 (Lab Core)                                                                                   |
| Ravi V.                           | Shah       |                       | MD               | Vanderbilt University Medical Center                                                                          | Nashville, Tennessee, USA                | ECHO Laboratory Core Principal Investigator             | U24OD035523 (Lab Core)                                                                                   |

## Supplemental Online Content: Nonauthor Collaborators

\*First name, last name, and suffix (if applicable) are required and will appear in PubMed.

| *First Name and Middle Initial(s) | *Last Name  | *Suffix (eg, Jr, III) | Academic Degrees | Institution                                            | Location (city, state/province, country) | Role or Contribution, eg, chair, principal investigator    | Group (if more than 1 Group listed in the byline) and/or Subgroup (eg, Steering Committee) |
|-----------------------------------|-------------|-----------------------|------------------|--------------------------------------------------------|------------------------------------------|------------------------------------------------------------|--------------------------------------------------------------------------------------------|
| Meghan H.                         | Shilts      |                       | MHS              | Vanderbilt University Medical Center                   | Nashville, Tennessee, USA                | ECHO Laboratory Core Principal Investigator Admin Designee | U24OD035523 (Lab Core)                                                                     |
| Akram N.                          | Alshawabkeh |                       | PhD              | Northeastern University                                | Boston, Massachusetts, USA               | ECHO Cohort Study Site Principal Investigator              | UG3/UH3OD023251 (Akram Alshawabkeh)                                                        |
| Jose F.                           | Cordero     |                       | MD               | University of Georgia                                  | Athens, Georgia; USA                     | ECHO Cohort Study Site Co-Director                         | UG3/UH3OD023251 (Akram Alshawabkeh)                                                        |
| John                              | Meeker      |                       | ScD              | University of Michigan                                 | Ann Arbor, Michigan; USA                 | ECHO Cohort Study Site Co-Director                         | UG3/UH3OD023251 (Akram Alshawabkeh)                                                        |
| Leonardo                          | Trasande    |                       | MD, MPP          | NYU Grossman School of Medicine                        | New York, New York, USA                  | ECHO Cohort Study Site Principal Investigator              | UG3/UH3OD023305 (Leonardo Trasande)                                                        |
| Carlos A.                         | Camargo     | Jr.                   | MD, DrPH         | Massachusetts General Hospital, Harvard Medical School | Boston, Massachusetts, USA               | ECHO Cohort Study Site Principal Investigator              | UG3/UH3OD023253 (Carlos Camargo)                                                           |
| Kohei                             | Hasegawa    |                       | MD, PhD          | Massachusetts General Hospital, Harvard Medical School | Boston, Massachusetts, USA               | ECHO Cohort Study Site Co-Investigator                     | UG3/UH3OD023253 (Carlos Camargo)                                                           |
| Zhaozhong                         | Zhu         |                       | ScD              | Massachusetts General Hospital, Harvard Medical School | Boston, Massachusetts, USA               | ECHO Cohort Study Site Co-Investigator                     | UG3/UH3OD023253 (Carlos Camargo)                                                           |
| Ashley F.                         | Sullivan    |                       | MS, MPH          | Massachusetts General Hospital, Harvard Medical School | Boston, Massachusetts, USA               | ECHO Cohort Study Site Award Project Director              | UG3/UH3OD023253 (Carlos Camargo)                                                           |
| Dana                              | Dabelea     |                       | MD, PhD          | University of Colorado Anschutz Medical Campus         | Aurora, Colorado, USA                    | ECHO Cohort Study Site Principal Investigator              | UG3/UH3OD023248 and UG3OD035526 (Dana Dabelea)                                             |
| Wei                               | Peng        |                       | PhD, MPH         | University of Colorado Anschutz Medical Campus         | Aurora, Colorado, USA                    | ECHO Cohort Study Site Principal Investigator              | UG3/UH3OD023248 (Dana Dabelea)                                                             |

## Supplemental Online Content: Nonauthor Collaborators

\*First name, last name, and suffix (if applicable) are required and will appear in PubMed.

| <b>*First Name and Middle Initial(s)</b> | <b>*Last Name</b> | <b>*Suffix (eg, Jr, III)</b> | Academic Degrees | Institution                                                          | Location (city, state/province, country) | Role or Contribution, eg, chair, principal investigator | Group (if more than 1 Group listed in the byline) and/or Subgroup (eg, Steering Committee) |
|------------------------------------------|-------------------|------------------------------|------------------|----------------------------------------------------------------------|------------------------------------------|---------------------------------------------------------|--------------------------------------------------------------------------------------------|
| Traci A.                                 | Bekelman          |                              | PhD, MPH         | University of Colorado Anschutz Medical Campus                       | Aurora, Colorado, USA                    | ECHO Cohort Study Site Principal Investigator           | UG3/UH3OD023248 (Dana Dabelea)                                                             |
| Greta                                    | Wilkening         |                              | PhD, MPH         | University of Colorado Anschutz Medical Campus                       | Aurora, Colorado, USA                    | ECHO Cohort Study Site Co-Investigator                  | UG3/UH3OD023248 (Dana Dabelea)                                                             |
| Sheryl                                   | Magzamen          |                              | PhD              | Colorado School of Public Health, Colorado State University          | Fort Collins, Colorado, USA              | ECHO Cohort Study Site Co-Investigator                  | UG3OD035526 (Dana Dabelea)                                                                 |
| Brianna F.                               | Moore             |                              | PhD, MS          | University of Colorado Anschutz Medical Campus                       | Aurora, Colorado, USA                    | ECHO Cohort Study Site Principal Investigator           | UG3OD035526 (Dana Dabelea)                                                                 |
| Anne P.                                  | Starling          |                              | PhD              | University of North Carolina at Chapel Hill                          | Chapel Hill, North Carolina, USA         | ECHO Cohort Study Site Principal Investigator           | UG3OD035526 (Dana Dabelea)                                                                 |
| Deborah J.                               | Rinehart          |                              | PhD              | Denver Health and Hospital Authority                                 | Denver, Colorado, USA                    | ECHO Cohort Study Site Co-Investigator                  | UG3OD035526 (Dana Dabelea)                                                                 |
| Daphne                                   | Koinis Mitchell   |                              | Ph.D             | Rhode Island Hospital, The Alpert Medical School of Brown University | Providence, Rhode Island, USA            | ECHO Cohort Study Site Principal Investigator           | UG3/UH3OD023313 (Daphne Koinis Mitchell)                                                   |
| Viren                                    | D'Sa              |                              | MD               | Rhode Island Hospital, The Alpert Medical School of Brown University | Providence, Rhode Island, USA            | ECHO Cohort Study Site Principal Investigator           | UG3/UH3OD023313 (Daphne Koinis Mitchell)                                                   |
| Sean C.L.                                | Deoni             |                              | PhD              | Bill & Melinda Gates Foundation                                      | Seattle, Washington, USA                 | ECHO Cohort Study Site Principal Investigator           | UG3/UH3OD023313 (Daphne Koinis Mitchell)                                                   |
| Hans-Georg                               | Mueller           |                              | PhD              | University of California, Davis                                      | Davis, California, USA                   | ECHO Cohort Study Site Co-Investigator                  | UG3/UH3OD023313 (Daphne Koinis Mitchell)                                                   |
| Cristiane S.                             | Duarte            |                              | PhD, MPH         | Columbia University - NYSPI                                          | New York, New York, USA                  | ECHO Cohort Study Site Principal Investigator           | UH3OD023328 (Cristiane Duarte)                                                             |

## Supplemental Online Content: Nonauthor Collaborators

\*First name, last name, and suffix (if applicable) are required and will appear in PubMed.

| *First Name and Middle Initial(s) | *Last Name    | *Suffix (eg, Jr, III) | Academic Degrees | Institution                                                               | Location (city, state/province, country)                      | Role or Contribution, eg, chair, principal investigator | Group (if more than 1 Group listed in the byline) and/or Subgroup (eg, Steering Committee) |
|-----------------------------------|---------------|-----------------------|------------------|---------------------------------------------------------------------------|---------------------------------------------------------------|---------------------------------------------------------|--------------------------------------------------------------------------------------------|
| Catherine                         | Monk          |                       | PhD              | Columbia University - NYSPI                                               | New York, New York, USA                                       | ECHO Cohort Study Site Principal Investigator           | UH3OD023328 (Cristiane Duarte)                                                             |
| Glorisa                           | Canino        |                       | PhD              | University of Puerto Rico, School of Medicine                             | Rio Piedras, Puerto Rico                                      | ECHO Cohort Study Site Principal Investigator           | UH3OD023328 (Cristiane Duarte)                                                             |
| Jonathan                          | Posner        |                       | MD               | Duke University School of Medicine, Duke Psychiatry & Behavioral Sciences | Durham, North Carolina, USA                                   | ECHO Cohort Study Site Principal Investigator           | UH3OD023328 (Cristiane Duarte)                                                             |
| Tenneill                          | Murray        |                       | MPH              | Columbia University - NYSPI                                               | New York, New York, USA                                       | ECHO Cohort Study Site Co-Director                      | UH3OD023328 (Cristiane Duarte)                                                             |
| Claudia                           | Lugo-Candelas |                       | PhD              | Columbia University - NYSPI                                               | New York, New York, USA                                       | ECHO Cohort Study Site Principal Investigator           | UH3OD023328 (Cristiane Duarte)                                                             |
| Anne L.                           | Dunlop        |                       | MD, MPH          | Emory University School of Medicine                                       | Atlanta, Georgia, USA                                         | ECHO Cohort Study Site Principal Investigator           | UH3OD023318 (Anne Dunlop)                                                                  |
| Patricia A.                       | Brennan       |                       | PhD              | Emory University                                                          | Atlanta, Georgia, USA                                         | ECHO Cohort Study Site Principal Investigator           | UH3OD023318 (Anne Dunlop)                                                                  |
| Christine                         | Hockett       |                       | PhD              | Avera Research Institute; University of South Dakota School of Medicine   | Rapid City, South Dakota, USA; Sioux Falls, South Dakota, USA | ECHO Cohort Study Site Principal Investigator           | UG3/UH3OD023279 (Amy Elliott)                                                              |
| Amy                               | Elliott       |                       | PhD              | Avera Research Institute ; University of South Dakota School of Medicine  | Sioux Falls, South Dakota, USA                                | ECHO Cohort Study Site Principal Investigator           | UG3/UH3OD023279 (Amy Elliott)                                                              |
| Assiamira                         | Ferrara       |                       | MD, PhD          | Kaiser Permanente Northern California                                     | Oakland, California, USA                                      | ECHO Cohort Study Site Principal Investigator           | UG3/UH3OD023289 (Assiamira Ferrara)                                                        |

## Supplemental Online Content: Nonauthor Collaborators

\*First name, last name, and suffix (if applicable) are required and will appear in PubMed.

| *First Name and Middle Initial(s) | *Last Name | *Suffix (eg, Jr, III) | Academic Degrees | Institution                                                  | Location (city, state/province, country) | Role or Contribution, eg, chair, principal investigator | Group (if more than 1 Group listed in the byline) and/or Subgroup (eg, Steering Committee) |
|-----------------------------------|------------|-----------------------|------------------|--------------------------------------------------------------|------------------------------------------|---------------------------------------------------------|--------------------------------------------------------------------------------------------|
| Lisa A.                           | Croen      |                       | PhD              | Kaiser Permanente Northern California                        | Oakland, California, USA                 | ECHO Cohort Study Site Principal Investigator           | UG3/UH3OD023342 (Kristen Lyall), UG3/UH3OD023290 (Julie Herbstman)                         |
| Monique M.                        | Hedderson  |                       | PhD              | Kaiser Permanente Northern California                        | Oakland, California, USA                 | ECHO Cohort Study Site Principal Investigator           | UG3/UH3OD023289 (Assiamira Ferrara), UG3OD035540 (Monique Marie Hedderson)                 |
| John                              | Ainsworth  |                       | PhD              | University of Manchester                                     | Manchester, United Kingdom               | ECHO Cohort Study Site Principal Investigator           | UG3/UH3OD023282 (James Gern)                                                               |
| Leonard B.                        | Bacharier  |                       | MD               | Vanderbilt University Medical Center                         | Nashville, Tennessee, USA                | ECHO Cohort Study Site Principal Investigator           | UG3/UH3OD023282 (James Gern)                                                               |
| Casper G.                         | Bendixsen  |                       | PhD              | Marshfield Clinic Research Institute                         | Marshfield, Wisconsin, USA               | ECHO Cohort Study Site Principal Investigator           | UG3/UH3OD023282 (James Gern)                                                               |
| James E.                          | Gern       |                       | MD               | University of Wisconsin School of Medicine and Public Health | Madison, Wisconsin, USA                  | ECHO Cohort Study Site Principal Investigator           | UG3/UH3OD023282 (James Gern), UG3OD035509 (Anne Marie Singh)                               |
| Diane R.                          | Gold       |                       | MD               | Brigham and Women's Hospital; Harvard Medical School         | Boston, Massachusetts, USA               | ECHO Cohort Study Site Principal Investigator           | UG3/UH3OD023282 (James Gern)                                                               |
| Tina V.                           | Hartert    |                       | MD, MPH          | Vanderbilt University Medical Center                         | Nashville, Tennessee, USA                | ECHO Cohort Study Site Principal Investigator           | UG3/UH3OD023282 (James Gern), UG3OD035516 and UG3OD035517 (Tina Hartert)                   |

## Supplemental Online Content: Nonauthor Collaborators

\*First name, last name, and suffix (if applicable) are required and will appear in PubMed.

| *First Name and Middle Initial(s) | *Last Name      | *Suffix (eg, Jr, III) | Academic Degrees | Institution                                                  | Location (city, state/province, country) | Role or Contribution, eg, chair, principal investigator | Group (if more than 1 Group listed in the byline) and/or Subgroup (eg, Steering Committee) |
|-----------------------------------|-----------------|-----------------------|------------------|--------------------------------------------------------------|------------------------------------------|---------------------------------------------------------|--------------------------------------------------------------------------------------------|
| Daniel J.                         | Jackson         |                       | MD               | University of Wisconsin School of Medicine and Public Health | Madison, Wisconsin, USA                  | ECHO Cohort Study Site Principal Investigator           | UG3/UH3OD023282 (James Gern)                                                               |
| Christine C.                      | Johnson         |                       | PhD              | Henry Ford Health                                            | Detroit, Michigan, USA                   | ECHO Cohort Study Site Principal Investigator           | UG3/UH3OD023282 (James Gern),<br>UG3OD035518 (Jennifer Straughen)                          |
| Christine L.M.                    | Joseph          |                       | PhD              | Henry Ford Health                                            | Detroit, Michigan, USA                   | ECHO Cohort Study Site Principal Investigator           | UG3/UH3OD023282 (James Gern)                                                               |
| Meyer                             | Kattan          |                       | MD               | Columbia University Medical Center                           | New York, New York, USA                  | ECHO Cohort Study Site Principal Investigator           | UG3/UH3OD023282 (James Gern)                                                               |
| Gurjit K.                         | Khurana Hershey |                       | MD, PhD          | Cincinnati Children's Hospital Medical Center                | Cincinnati, Ohio, USA                    | ECHO Cohort Study Site Principal Investigator           | UG3/UH3OD023282 (James Gern)                                                               |
| Robert F.                         | Lemanske, Jr.   |                       | MD               | University of Wisconsin School of Medicine and Public Health | Madison, Wisconsin, USA                  | ECHO Cohort Study Site Principal Investigator           | UG3/UH3OD023282 (James Gern)                                                               |
| Susan V.                          | Lynch           |                       | PhD              | University of California                                     | San Francisco, California, USA           | ECHO Cohort Study Site Principal Investigator           | UG3/UH3OD023282 (James Gern)                                                               |
| Rachel L.                         | Miller          |                       | MD               | Icahn School of Medicine at Mount Sinai                      | New York, New York, USA                  | ECHO Cohort Study Site Principal Investigator           | UG3/UH3OD023282 (James Gern),<br>UG3/UH3OD023290 (Julie Herbstman)                         |
| George T.                         | O'Connor        |                       | MD               | Boston University School of Medicine                         | Boston, Massachusetts, USA               | ECHO Cohort Study Site Principal Investigator           | UG3/UH3OD023282 (James Gern)                                                               |

## Supplemental Online Content: Nonauthor Collaborators

\*First name, last name, and suffix (if applicable) are required and will appear in PubMed.

| *First Name and Middle Initial(s) | *Last Name       | *Suffix (eg, Jr, III) | Academic Degrees | Institution                                                  | Location (city, state/province, country) | Role or Contribution, eg, chair, principal investigator | Group (if more than 1 Group listed in the byline) and/or Subgroup (eg, Steering Committee) |
|-----------------------------------|------------------|-----------------------|------------------|--------------------------------------------------------------|------------------------------------------|---------------------------------------------------------|--------------------------------------------------------------------------------------------|
| Carole                            | Ober             |                       | PhD              | University of Chicago                                        | Chicago, Illinois, USA                   | ECHO Cohort Study Site Principal Investigator           | UG3/UH3OD023282 (James Gern), UG3OD035509 (Anne Marie Singh)                               |
| Dennis                            | Ownby            |                       | MD               | Henry Ford Health                                            | Detroit, Michigan, USA                   | ECHO Cohort Study Site Principal Investigator           | UG3/UH3OD023282 (James Gern)                                                               |
| Katherine                         | Rivera-Spoljaric |                       | MD               | Washington University School of Medicine                     | St Louis, Missouri, USA                  | ECHO Cohort Study Site Principal Investigator           | UG3/UH3OD023282 (James Gern), UG3OD035521 (Katherine Rivera-Spoljaric)                     |
| Patrick H.                        | Ryan             |                       | PhD              | University of Cincinnati                                     | Cincinnati, Ohio, USA                    | ECHO Cohort Study Site Principal Investigator           | UG3/UH3OD023282 (James Gern), UG3OD035509 (Anne Marie Singh)                               |
| Christine M.                      | Seroogy          |                       | MD               | University of Wisconsin School of Medicine and Public Health | Madison, Wisconsin, USA                  | ECHO Cohort Study Site Principal Investigator           | UG3/UH3OD023282 (James Gern)                                                               |
| Anne Marie                        | Singh            |                       | MD               | University of Wisconsin School of Medicine and Public Health | Madison, Wisconsin, USA                  | ECHO Cohort Study Site Principal Investigator           | UG3/UH3OD023282 (James Gern), UG3OD035509 (Anne Marie Singh)                               |
| Robert A.                         | Wood             |                       | MD               | Johns Hopkins University School of Medicine                  | Baltimore, Maryland, USA                 | ECHO Cohort Study Site Principal Investigator           | UG3/UH3OD023282 (James Gern)                                                               |
| Edward M.                         | Zoratti          |                       | MD               | Henry Ford Health                                            | Detroit, Michigan, USA                   | ECHO Cohort Study Site Principal Investigator           | UG3/UH3OD023282 (James Gern), UG3OD035518 (Jennifer Straughen)                             |

## Supplemental Online Content: Nonauthor Collaborators

\*First name, last name, and suffix (if applicable) are required and will appear in PubMed.

| *First Name and Middle Initial(s) | *Last Name      | *Suffix (eg, Jr, III) | Academic Degrees | Institution                       | Location (city, state/province, country) | Role or Contribution, eg, chair, principal investigator | Group (if more than 1 Group listed in the byline) and/or Subgroup (eg, Steering Committee)             |
|-----------------------------------|-----------------|-----------------------|------------------|-----------------------------------|------------------------------------------|---------------------------------------------------------|--------------------------------------------------------------------------------------------------------|
| Rima                              | Habre           |                       | ScD, MSc         | University of Southern California | Los Angeles, California, USA             | ECHO Cohort Study Site Principal Investigator           | UH3OD023287 (Carrie Breton)                                                                            |
| Shohreh                           | Farzan          |                       | PhD              | University of Southern California | Los Angeles, California, USA             | ECHO Cohort Study Site Principal Investigator           | UH3OD023287 (Carrie Breton)                                                                            |
| Frank D.                          | Gilliland       |                       | MD, MPH, PhD     | University of Southern California | Los Angeles, California, USA             | ECHO Cohort Study Site Principal Investigator           | UH3OD023287 (Carrie Breton)                                                                            |
| Irva                              | Hertz-Picciotto |                       | PhD              | University of California, Davis   | Davis, California, USA                   | ECHO Cohort Study Site Principal Investigator           | UG3/UH3OD023365 (Irva Hertz-Picciotto), UG3OD035550 (Rebecca Schmidt)                                  |
| Deborah H.                        | Bennett         |                       | Ph.D             | University of California, Davis   | Davis, California, USA                   | ECHO Cohort Study Site Principal Investigator           | UG3/UH3OD023365 (Irva Hertz-Picciotto), UG3OD035550 (Rebecca Schmidt)                                  |
| Julie B.                          | Schweitzer      |                       | Ph.D             | University of California, Davis   | Davis, California, USA                   | ECHO Cohort Study Site Principal Investigator           | UG3/UH3OD023365 (Irva Hertz-Picciotto)                                                                 |
| Rebecca J.                        | Schmidt         |                       | Ph.D             | University of California, Davis   | Davis, California, USA                   | ECHO Cohort Study Site Principal Investigator           | UG3/UH3OD023365 (Irva Hertz-Picciotto), UG3/UH3OD023342 (Kristen Lyall), UG3OD035550 (Rebecca Schmidt) |
| Janine M.                         | LaSalle         |                       | PhD              | University of California, Davis   | Davis, California, USA                   | ECHO Cohort Study Site Co-Investigator                  | UG3/UH3OD023365 (Irva Hertz-Picciotto), UG3OD035550 (Rebecca Schmidt)                                  |

## Supplemental Online Content: Nonauthor Collaborators

\*First name, last name, and suffix (if applicable) are required and will appear in PubMed.

| *First Name and Middle Initial(s) | *Last Name     | *Suffix (eg, Jr, III) | Academic Degrees | Institution                                                        | Location (city, state/province, country) | Role or Contribution, eg, chair, principal investigator | Group (if more than 1 Group listed in the byline) and/or Subgroup (eg, Steering Committee) |
|-----------------------------------|----------------|-----------------------|------------------|--------------------------------------------------------------------|------------------------------------------|---------------------------------------------------------|--------------------------------------------------------------------------------------------|
| Alison E.                         | Hipwell        |                       | PhD, ClinPsyD    | University of Pittsburgh                                           | Pittsburgh, Pennsylvania, USA            | ECHO Cohort Study Site Principal Investigator           | UG3/UH3OD023244 (Alison Hipwell)                                                           |
| Kate E.                           | Keenan         |                       | PhD              | University of Chicago                                              | Chicago, Illinois, USA                   | ECHO Cohort Study Site Principal Investigator           | UG3/UH3OD023244 (Alison Hipwell)                                                           |
| Catherine J.                      | Karr           |                       | MD, MS, PhD      | University of Washington                                           | Seattle, Washington, USA                 | ECHO Cohort Study Site Principal Investigator           | UH3OD023271 and UG3OD035528 (Catherine Karr)                                               |
| Nicole R.                         | Bush           |                       | PhD              | University of California, San Francisco                            | San Francisco, California, USA           | ECHO Cohort Study Site Principal Investigator           | UH3OD023271 (Catherine Karr), UG3OD035519 (Qi Zhao)                                        |
| Kaja Z.                           | LeWinn         |                       | ScD              | University of California, San Francisco                            | San Francisco, California, USA           | ECHO Cohort Study Site Principal Investigator           | UH3OD023271 (Catherine Karr), UG3OD035519 (Qi Zhao)                                        |
| Sheela                            | Sathyanarayana |                       | MD, MPH          | University of Washington and Seattle Children's Research Institute | Seattle, Washington, USA                 | ECHO Cohort Study Site Principal Investigator           | UH3OD023271 (Catherine Karr), UG3OD035508 (Sheela Sathyanarayana)                          |
| Qi                                | Zhao           |                       | MD, PhD          | University of Tennessee Health Science Center                      | Memphis, Tennessee, USA                  | ECHO Cohort Study Site Principal Investigator           | UH3OD023271 (Catherine Karr), UG3OD035519 (Qi Zhao)                                        |
| Frances                           | Tylavsky       |                       | DrPH, MS         | University of Tennessee Health Science Center                      | Memphis, Tennessee, USA                  | ECHO Cohort Study Site Principal Investigator           | UH3OD023271 (Catherine Karr)                                                               |
| Kecia N.                          | Carroll        |                       | MD, MPH          | Icahn School of Medicine at Mount Sinai                            | New York, New York, USA                  | ECHO Cohort Study Site Principal Investigator           | UH3OD023271 (Catherine Karr), UG3/UH3OD023337 (Rosalind Wright)                            |

## Supplemental Online Content: Nonauthor Collaborators

\*First name, last name, and suffix (if applicable) are required and will appear in PubMed.

| *First Name and Middle Initial(s) | *Last Name  | *Suffix (eg, Jr, III) | Academic Degrees | Institution                                                | Location (city, state/province, country) | Role or Contribution, eg, chair, principal investigator | Group (if more than 1 Group listed in the byline) and/or Subgroup (eg, Steering Committee) |
|-----------------------------------|-------------|-----------------------|------------------|------------------------------------------------------------|------------------------------------------|---------------------------------------------------------|--------------------------------------------------------------------------------------------|
| Christine T.                      | Loftus      |                       | MS MPH<br>PhD    | University of Washington                                   | Seattle, Washington, USA                 | ECHO Cohort Study<br>Site Principal<br>Investigator     | UH3OD023271 (Catherine Karr)                                                               |
| Leslie D.                         | Leve        |                       | PhD              | University of Oregon                                       | Eugene, Oregon, USA                      | ECHO Cohort Study<br>Site Principal<br>Investigator     | UG3/UH3OD023389<br>(Leslie Leve)                                                           |
| Jody M.                           | Ganiban     |                       | PhD              | George Washington University                               | Washington, DC, USA                      | ECHO Cohort Study<br>Site Principal<br>Investigator     | UG3/UH3OD023389<br>(Leslie Leve)                                                           |
| Jenae M.                          | Neiderhiser |                       | PhD              | Penn State University                                      | University Park,<br>Pennsylvania, USA    | ECHO Cohort Study<br>Site Principal<br>Investigator     | UG3/UH3OD023389<br>(Leslie Leve)                                                           |
| Scott T.                          | Weiss       |                       | MD               | Brigham and Women's Hospital and<br>Harvard Medical School | Boston, Massachusetts,<br>USA            | ECHO Cohort Study<br>Site Principal<br>Investigator     | UH3OD023268 (Scott Weiss)                                                                  |
| Augusto A.                        | Litonjua    |                       | MD               | Golisano Children's Hospital,<br>University of Rochester   | Rochester, New York, USA                 | ECHO Cohort Study<br>Site Principal<br>Investigator     | UH3OD023268 (Scott Weiss)                                                                  |
| Cindy T.                          | McEvoy      |                       | MD, MCR          | Oregon Health & Science University                         | Portland, Oregon, USA                    | ECHO Cohort Study<br>Site Principal<br>Investigator     | UG3/UH3OD023288<br>(Cynthia McEvoy)                                                        |
| Eliot R.                          | Spindel     |                       | MD, PhD          | Oregon National Primate Research<br>Center                 | Beaverton, Oregon, USA                   | ECHO Cohort Study<br>Site Principal<br>Investigator     | UG3/UH3OD023288<br>(Cynthia McEvoy)                                                        |
| Robert S.                         | Tepper      |                       | MD, PhD          | Indiana School of Medicine                                 | Indianapolis, Indiana, USA               | ECHO Cohort Study<br>Site Co-Investigator               | UG3/UH3OD023288<br>(Cynthia McEvoy)                                                        |
| Craig J.                          | Newschaffer |                       | PhD              | Penn State                                                 | State College,<br>Pennsylvania, USA      | ECHO Cohort Study<br>Site Principal<br>Investigator     | UG3/UH3OD023342<br>(Kristen Lyall)                                                         |

## Supplemental Online Content: Nonauthor Collaborators

\*First name, last name, and suffix (if applicable) are required and will appear in PubMed.

| *First Name and Middle Initial(s) | *Last Name | *Suffix (eg, Jr, III) | Academic Degrees | Institution                                                                                  | Location (city, state/province, country) | Role or Contribution, eg, chair, principal investigator | Group (if more than 1 Group listed in the byline) and/or Subgroup (eg, Steering Committee) |
|-----------------------------------|------------|-----------------------|------------------|----------------------------------------------------------------------------------------------|------------------------------------------|---------------------------------------------------------|--------------------------------------------------------------------------------------------|
| Kristen                           | Lyall      |                       | ScD              | Drexel University                                                                            | Philadelphia, Pennsylvania, USA          | ECHO Cohort Study Site Principal Investigator           | UG3/UH3OD023342 (Kristen Lyall)                                                            |
| Heather E.                        | Volk       |                       | PhD              | Johns Hopkins University                                                                     | Baltimore, Maryland, USA                 | ECHO Cohort Study Site Principal Investigator           | UG3/UH3OD023342 (Kristen Lyall)                                                            |
| Rebecca                           | Landa      |                       | PhD              | Center for Autism and Related Disorders, Kennedy Krieger Institute, Johns Hopkins University | Baltimore, Maryland, USA                 | ECHO Cohort Study Site Co-Investigator                  | UG3/UH3OD023342 (Kristen Lyall)                                                            |
| Sally                             | Ozonoff    |                       | PhD              | University of California Davis                                                               | Sacramento, California, USA              | ECHO Cohort Study Site Co-Investigator                  | UG3/UH3OD023342 (Kristen Lyall)                                                            |
| Joseph                            | Piven      |                       | MD               | University of North Carolina                                                                 | Chapel Hill, North Carolina, USA         | ECHO Cohort Study Site Co-Investigator                  | UG3/UH3OD023342 (Kristen Lyall)                                                            |
| Heather                           | Hazlett    |                       | PhD              | University of North Carolina                                                                 | Chapel Hill, North Carolina, USA         | ECHO Cohort Study Site Co-Investigator                  | UG3/UH3OD023342 (Kristen Lyall)                                                            |
| Juhi                              | Pandey     |                       | PhD              | Children's Hospital of Philadelphia                                                          | Philadelphia, Pennsylvania, USA          | ECHO Cohort Study Site Co-Investigator                  | UG3/UH3OD023342 (Kristen Lyall)                                                            |
| Robert                            | Schultz    |                       | PhD              | Children's Hospital of Philadelphia                                                          | Philadelphia, Pennsylvania, USA          | ECHO Cohort Study Site Co-Investigator                  | UG3/UH3OD023342 (Kristen Lyall)                                                            |
| Steven                            | Dager      |                       | PhD              | University of Washington                                                                     | Seattle, Washington, USA                 | ECHO Cohort Study Site Co-Investigator                  | UG3/UH3OD023342 (Kristen Lyall)                                                            |
| Kelly                             | Botteron   |                       | PhD              | Washington University                                                                        | St Louis, Missouri, USA                  | ECHO Cohort Study Site Co-Investigator                  | UG3/UH3OD023342 (Kristen Lyall)                                                            |
| Daniel                            | Messinger  |                       | PhD              | University of Miami                                                                          | Miami, Florida, USA                      | ECHO Cohort Study Site Co-Investigator                  | UG3/UH3OD023342 (Kristen Lyall)                                                            |
| Wendy                             | Stone      |                       | PhD              | University of Washington                                                                     | Seattle, Washington, USA                 | ECHO Cohort Study Site Co-Investigator                  | UG3/UH3OD023342 (Kristen Lyall)                                                            |
| Jennifer                          | Ames       |                       | PhD              | Kaiser Permanente                                                                            | Oakland, California, USA                 | ECHO Cohort Study Site Co-Investigator                  | UG3/UH3OD023342 (Kristen Lyall)                                                            |

## Supplemental Online Content: Nonauthor Collaborators

\*First name, last name, and suffix (if applicable) are required and will appear in PubMed.

| *First Name and Middle Initial(s) | *Last Name | *Suffix (eg, Jr, III) | Academic Degrees | Institution                                                          | Location (city, state/province, country) | Role or Contribution, eg, chair, principal investigator | Group (if more than 1 Group listed in the byline) and/or Subgroup (eg, Steering Committee) |
|-----------------------------------|------------|-----------------------|------------------|----------------------------------------------------------------------|------------------------------------------|---------------------------------------------------------|--------------------------------------------------------------------------------------------|
| Thomas G.                         | O'Connor   |                       | PhD              | University of Rochester                                              | Rochester, New York, USA                 | ECHO Cohort Study Site Principal Investigator           | UG3/UH3OD023349 (Thomas O'Connor)                                                          |
| Richard K.                        | Miller     |                       | PhD              | University of Rochester                                              | Rochester, New York, USA                 | ECHO Cohort Study Site Principal Investigator           | UG3/UH3OD023349 (Thomas O'Connor)                                                          |
| Emily                             | Oken       |                       | MD, MPH          | Harvard Pilgrim Health Care Institute and Harvard Medical School     | Boston, Massachusetts, USA               | ECHO Cohort Study Site Principal Investigator           | UH3OD023286 and UG3OD035533 (Emily Oken)                                                   |
| Michele R.                        | Hacker     |                       | ScD              | Beth Israel Deaconess Medical Center                                 | Boston, Massachusetts, USA               | ECHO Cohort Study Site Principal Investigator           | UG3OD035533 (Emily Oken)                                                                   |
| Tamarra                           | James-Todd |                       | PhD              | Harvard Chan School of Public Health                                 | Boston, Massachusetts, USA               | ECHO Cohort Study Site Principal Investigator           | UG3OD035533 (Emily Oken)                                                                   |
| T. Michael                        | O'Shea     | Jr                    | MD, MPH          | University of North Carolina School of Medicine                      | Chapel Hill, North Carolina, USA         | ECHO Cohort Study Site Principal Investigator           | UG3/UH3OD023348 (Mike O'Shea), UH3OD023347 (Barry Lester)                                  |
| Rebecca C.                        | Fry        |                       | PhD              | University of North Carolina Gillings School of Global Public Health | Chapel Hill, North Carolina, USA         | ECHO Cohort Study Site Principal Investigator           | UG3/UH3OD023348 (Mike O'Shea)                                                              |
| Jean A.                           | Frazier    |                       | MD               | UMASS Chan Medical School                                            | Worcster, Massachusetts, USA             | ECHO Cohort Study Site Co-Investigator                  | UG3/UH3OD023348 (Mike O'Shea)                                                              |
| Rachana                           | Singh      |                       | MD, MS           | Tufts University School of Medicine                                  | Boston, Massachusetts, USA               | ECHO Cohort Study Site Co-Investigator                  | UG3/UH3OD023348 (Mike O'Shea)                                                              |
| Caitlin                           | Rollins    |                       | MD, SM           | Harvard Medical School                                               | Boston, Massachusetts, USA               | ECHO Cohort Study Site Co-Investigator                  | UG3/UH3OD023348 (Mike O'Shea)                                                              |
| Angela                            | Montgomery |                       | MD               | Yale School of Medicine                                              | New Haven, Connecticut, USA              | ECHO Cohort Study Site Co-Investigator                  | UG3/UH3OD023348 (Mike O'Shea)                                                              |

## Supplemental Online Content: Nonauthor Collaborators

\*First name, last name, and suffix (if applicable) are required and will appear in PubMed.

| *First Name and Middle Initial(s) | *Last Name | *Suffix (eg, Jr, III) | Academic Degrees | Institution                                                                                                                       | Location (city, state/province, country) | Role or Contribution, eg, chair, principal investigator | Group (if more than 1 Group listed in the byline) and/or Subgroup (eg, Steering Committee)    |
|-----------------------------------|------------|-----------------------|------------------|-----------------------------------------------------------------------------------------------------------------------------------|------------------------------------------|---------------------------------------------------------|-----------------------------------------------------------------------------------------------|
| Ruben                             | Vaidya     |                       | MD               | University of Massachusetts Chan Medical School-Baystate                                                                          | Springfield, Massachusetts, USA          | ECHO Cohort Study Site Co-Investigator                  | UG3/UH3OD023348 (Mike O'Shea)                                                                 |
| Robert M.                         | Joseph     |                       | PhD              | Boston University Chobanian & Avedisian School of Medicine                                                                        | Boston, Massachusetts, USA               | ECHO Cohort Study Site Co-Investigator                  | UG3/UH3OD023348 (Mike O'Shea)                                                                 |
| Lisa K.                           | Washburn   |                       | MD               | Wake Forest School of Medicine                                                                                                    | Winston-Salem, North Carolina, USA       | ECHO Cohort Study Site Co-Investigator                  | UG3/UH3OD023348 (Mike O'Shea)                                                                 |
| Semsa                             | Gogcu      |                       | MD, MPH          | Wake Forest School of Medicine; Wake Forest University School of Medicine/Atrium Health Wake Forest                               | Winston-Salem, North Carolina, USA       | ECHO Cohort Study Site Co-Investigator                  | UG3/UH3OD023348 (Mike O'Shea), UG3OD035513 (Annemarie Stroustrup), UH3OD023320 (Judy Aschner) |
| Kelly                             | Bear       |                       | DO               | ECU Health                                                                                                                        | Greenville, North Carolina, USA          | ECHO Cohort Study Site Co-Investigator                  | UG3/UH3OD023348 (Mike O'Shea)                                                                 |
| Julie V.                          | Rollins    |                       | MA               | University of North Carolina School of Medicine                                                                                   | Chapel Hill, North Carolina, USA         | ECHO Cohort Study Site Award Project Director           | UG3/UH3OD023348 (Mike O'Shea)                                                                 |
| Stephen R.                        | Hooper     |                       | PhD              | School of Medicine, University of North Carolina at Chapel Hill                                                                   | Chapel Hill, North Carolina, USA         | ECHO Cohort Study Site Co-Investigator                  | UG3/UH3OD023348 (Mike O'Shea)                                                                 |
| Genevieve                         | Taylor     |                       | MD               | School of Medicine, University of North Carolina at Chapel Hill                                                                   | Chapel Hill, North Carolina, USA         | ECHO Cohort Study Site Co-Investigator                  | UG3/UH3OD023348 (Mike O'Shea)                                                                 |
| Wesley                            | Jackson    |                       | MD, MPH          | University of North Carolina School of Medicine                                                                                   | Chapel Hill, North Carolina, USA         | ECHO Cohort Study Site Co-Investigator                  | UG3/UH3OD023348 (Mike O'Shea)                                                                 |
| Amanda                            | Thompson   |                       | PhD              | University of North Carolina at Chapel Hill; Gillings School of Global Public Health, University of North Carolina at Chapel Hill | Chapel Hill, North Carolina, USA         | ECHO Cohort Study Site Co-Investigator                  | UG3/UH3OD023348 (Mike O'Shea)                                                                 |
| Julie                             | Daniels    |                       | PhD              | University of North Carolina at Chapel Hill; Gillings School of Global Public Health, University of North Carolina at Chapel Hill | Chapel Hill, North Carolina, USA         | ECHO Cohort Study Site Co-Investigator                  | UG3/UH3OD023348 (Mike O'Shea)                                                                 |

## Supplemental Online Content: Nonauthor Collaborators

\*First name, last name, and suffix (if applicable) are required and will appear in PubMed.

| *First Name and Middle Initial(s) | *Last Name | *Suffix (eg, Jr, III) | Academic Degrees | Institution                                                                          | Location (city, state/province, country) | Role or Contribution, eg, chair, principal investigator | Group (if more than 1 Group listed in the byline) and/or Subgroup (eg, Steering Committee) |
|-----------------------------------|------------|-----------------------|------------------|--------------------------------------------------------------------------------------|------------------------------------------|---------------------------------------------------------|--------------------------------------------------------------------------------------------|
| Michelle                          | Hernandez  |                       | MD               | School of Medicine, University of North Carolina at Chapel Hill                      | Chapel Hill, North Carolina, USA         | ECHO Cohort Study Site Co-Investigator                  | UG3/UH3OD023348 (Mike O'Shea)                                                              |
| Kun                               | Lu         |                       | PhD              | Gillings School of Global Public Health, University of North Carolina at Chapel Hill | Chapel Hill, North Carolina, USA         | ECHO Cohort Study Site Co-Investigator                  | UG3/UH3OD023348 (Mike O'Shea)                                                              |
| Michael                           | Msall      |                       | MD               | University of Chicago Medicine: Comer Children's Hospital                            | Chicago Illinois, USA                    | ECHO Cohort Study Site Co-Investigator                  | UG3/UH3OD023348 (Mike O'Shea)                                                              |
| Madeleine                         | Lenski     |                       | MSPH             | Michigan State University                                                            | East Lansing, Michigan, USA              | ECHO Cohort Study Site Co-Investigator                  | UG3/UH3OD023348 (Mike O'Shea)                                                              |
| Rawad                             | Obeid      |                       | MD               | Beaumont Hospital                                                                    | Royal Oak, Michigan, USA                 | ECHO Cohort Study Site Co-Investigator                  | UG3/UH3OD023348 (Mike O'Shea)                                                              |
| Steven L.                         | Pastyrnak  |                       | PhD              | Corewell Health, Helen DeVos Children's Hospital                                     | Grand Rapids, Michigan, USA              | ECHO Cohort Study Site Co-Investigator                  | UG3/UH3OD023348 (Mike O'Shea), UH3OD023347 (Barry Lester)                                  |
| Elizabeth                         | Jensen     |                       | PhD              | Wake Forest University School of Medicine                                            | Winston-Salem, North Carolina, USA       | ECHO Cohort Study Site Co-Investigator                  | UG3/UH3OD023348 (Mike O'Shea)                                                              |
| Christina                         | Sakai      |                       | MD               | Mass General Hospital for Children                                                   | Boston, Massachusetts, USA               | ECHO Cohort Study Site Co-Investigator                  | UG3/UH3OD023348 (Mike O'Shea)                                                              |
| Hudson                            | Santos     |                       | RN, PhD          | University of Miami                                                                  | Coral Gables, Florida, USA               | ECHO Cohort Study Site Principal Investigator           | UG3/UH3OD023348 (Mike O'Shea), UG3OD035542 (Hudson Santos)                                 |
| Jean M.                           | Kerver     |                       | PhD, MSc, RD     | Michigan State University, College of Human Medicine                                 | East Lansing, Michigan, USA              | ECHO Cohort Study Site Principal Investigator           | UG3/UH3OD023285 (Jean Kerver)                                                              |
| Nigel                             | Paneth     |                       | MD, MPH          | Michigan State University, College of Human Medicine                                 | East Lansing, Michigan, USA              | ECHO Cohort Study Site Principal Investigator           | UG3/UH3OD023285 (Jean Kerver)                                                              |

## Supplemental Online Content: Nonauthor Collaborators

\*First name, last name, and suffix (if applicable) are required and will appear in PubMed.

| *First Name and Middle Initial(s) | *Last Name | *Suffix (eg, Jr, III) | Academic Degrees | Institution                                              | Location (city, state/province, country) | Role or Contribution, eg, chair, principal investigator | Group (if more than 1 Group listed in the byline) and/or Subgroup (eg, Steering Committee) |
|-----------------------------------|------------|-----------------------|------------------|----------------------------------------------------------|------------------------------------------|---------------------------------------------------------|--------------------------------------------------------------------------------------------|
| Charles J.                        | Barone     | II                    | MD, FAAP         | Henry Ford Health                                        | Detroit, Michigan, USA                   | ECHO Cohort Study Site Principal Investigator           | UG3/UH3OD023285 (Jean Kerver),<br>UG3/UH3OD023282 (James Gern)                             |
| Michael R.                        | Elliott    |                       | PhD              | University of Michigan                                   | Ann Arbor, Michigan, USA                 | ECHO Cohort Study Site Principal Investigator           | UG3/UH3OD023285 (Jean Kerver)                                                              |
| Douglas M.                        | Ruden      |                       | PhD              | Wayne State University                                   | Detroit, Michigan, USA                   | ECHO Cohort Study Site Principal Investigator           | UG3/UH3OD023285 (Jean Kerver)                                                              |
| Chris                             | Fussman    |                       | MS               | Michigan Department of Health and Human Services (MDHHS) | Lansing, Michigan, USA                   | ECHO Cohort Study Site Principal Investigator           | UG3/UH3OD023285 (Jean Kerver)                                                              |
| Julie B.                          | Herbstman  |                       | PhD              | Columbia University Mailman School of Public Health      | New York, New York, USA                  | ECHO Cohort Study Site Principal Investigator           | UG3/UH3OD023290 (Julie Herbstman)                                                          |
| Amy                               | Margolis   |                       | PhD              | Columbia University Irving Medical Center                | New York, New York, USA                  | ECHO Cohort Study Site Principal Investigator           | UG3/UH3OD023290 (Julie Herbstman)                                                          |
| Susan L.                          | Schantz    |                       | PhD              | University of Illinois Urbana-Champaign                  | Urbana, Illinois, USA                    | ECHO Cohort Study Site Principal Investigator           | UG3/UH3OD023272 (Susan Schantz)                                                            |
| Sarah Dee                         | Geiger     |                       | PhD              | University of Illinois Urbana-Champaign                  | Urbana, Illinois, USA                    | ECHO Cohort Study Site Co-Investigator                  | UG3/UH3OD023272 (Susan Schantz)                                                            |
| Andrea                            | Aguiar     |                       | PhD              | University of Illinois Urbana-Champaign                  | Urbana, Illinois, USA                    | ECHO Cohort Study Site Co-Investigator                  | UG3/UH3OD023272 (Susan Schantz)                                                            |
| Karen                             | Tabb       |                       | PhD, MSW         | University of Illinois Urbana-Champaign                  | Urbana, Illinois, USA                    | ECHO Cohort Study Site Co-Investigator                  | UG3/UH3OD023272 (Susan Schantz)                                                            |
| Rita                              | Strakovsky |                       | PhD              | Michigan State University                                | East Lansing, Michigan, USA              | ECHO Cohort Study Site Co-Investigator                  | UG3/UH3OD023272 (Susan Schantz)                                                            |

## Supplemental Online Content: Nonauthor Collaborators

\*First name, last name, and suffix (if applicable) are required and will appear in PubMed.

| *First Name and Middle Initial(s) | *Last Name        | *Suffix (eg, Jr, III) | Academic Degrees | Institution                                                     | Location (city, state/province, country) | Role or Contribution, eg, chair, principal investigator | Group (if more than 1 Group listed in the byline) and/or Subgroup (eg, Steering Committee) |
|-----------------------------------|-------------------|-----------------------|------------------|-----------------------------------------------------------------|------------------------------------------|---------------------------------------------------------|--------------------------------------------------------------------------------------------|
| Tracey                            | Woodruff          |                       | PhD, MPH         | University of California, San Francisco                         | San Francisco, California, USA           | ECHO Cohort Study Site Principal Investigator           | UG3/UH3OD023272 (Susan Schantz)                                                            |
| Rachel                            | Morello-Frosch    |                       | PhD, MPH         | University of California, Berkeley                              | Berkeley, California, USA                | ECHO Cohort Study Site Principal Investigator           | UG3/UH3OD023272 (Susan Schantz)                                                            |
| Amy                               | Padula            |                       | PhD              | University of California, San Francisco                         | San Francisco, California, USA           | ECHO Cohort Study Site Co-Investigator                  | UG3/UH3OD023272 (Susan Schantz)                                                            |
| Joseph B.                         | Stanford          |                       | MD, MSPH         | Spencer Fox Eccles School of Medicine, University of Utah       | Salt Lake City, Utah, USA                | ECHO Cohort Study Site Principal Investigator           | UG3/UH3OD023249 (Joseph Stanford)                                                          |
| Christina A.                      | Porucznik         |                       | PhD, MSPH        | Spencer Fox Eccles School of Medicine, University of Utah       | Salt Lake City, Utah, USA                | ECHO Cohort Study Site Principal Investigator           | UG3/UH3OD023249 (Joseph Stanford)                                                          |
| Angelo P.                         | Giardino          |                       | MD, PhD          | Spencer Fox Eccles School of Medicine, University of Utah       | Salt Lake City, Utah, USA                | ECHO Cohort Study Site Principal Investigator           | UG3/UH3OD023249 (Joseph Stanford)                                                          |
| Rosalind J.                       | Wright            |                       | MD, MPH          | Icahn School of Medicine at Mount Sinai                         | New York, New York, USA                  | ECHO Cohort Study Site Principal Investigator           | UG3/UH3OD023337 (Rosalind Wright)                                                          |
| Robert O.                         | Wright            |                       | MD, MPH          | Icahn School of Medicine at Mount Sinai                         | New York, New York, USA                  | ECHO Cohort Study Site Principal Investigator           | UG3/UH3OD023337 (Rosalind Wright)                                                          |
| Brent                             | Collett           |                       | PhD              | University of Washington, Seattle Children's Research Institute | Seattle, Washington, USA                 | ECHO Cohort Study Site Principal Investigator           | UG3OD035508 (Sheela Sathyanarayana)                                                        |
| Nicole                            | Baumann-Blackmore |                       | MD               | University of Wisconsin School of Medicine and Public Health    | Madison, Wisconsin, USA                  | ECHO Cohort Study Site Co-Investigator                  | UG3OD035509 (Anne Marie Singh)                                                             |
| Ronald                            | Gangnon           |                       | PhD              | University of Wisconsin                                         | Madison, Wisconsin, USA                  | ECHO Cohort Study Site Co-Investigator                  | UG3OD035509 (Anne Marie Singh)                                                             |

## Supplemental Online Content: Nonauthor Collaborators

\*First name, last name, and suffix (if applicable) are required and will appear in PubMed.

| *First Name and Middle Initial(s) | *Last Name | *Suffix (eg, Jr, III) | Academic Degrees | Institution                                                                                                      | Location (city, state/province, country)      | Role or Contribution, eg, chair, principal investigator | Group (if more than 1 Group listed in the byline) and/or Subgroup (eg, Steering Committee) |
|-----------------------------------|------------|-----------------------|------------------|------------------------------------------------------------------------------------------------------------------|-----------------------------------------------|---------------------------------------------------------|--------------------------------------------------------------------------------------------|
| Daniel J.                         | Jackson    |                       | MD               | University of Wisconsin School of Medicine and Public Health                                                     | Madison, Wisconsin, USA                       | ECHO Cohort Study Site Co-Investigator                  | UG3OD035509 (Anne Marie Singh)                                                             |
| Chris G.                          | McKenna    |                       | PhD              | University of Pittsburgh                                                                                         | Pittsburgh, Pennsylvania, USA                 | ECHO Cohort Study Site Co-Investigator                  | UG3OD035509 (Anne Marie Singh)                                                             |
| Jo                                | Wilson     |                       | MD               | University of Wisconsin School of Medicine and Public Health                                                     | Madison, Wisconsin, USA                       | ECHO Cohort Study Site Co-Investigator                  | UG3OD035509 (Anne Marie Singh)                                                             |
| Matt                              | Altman     |                       | MD               | University of Washington                                                                                         | Seattle, Washington, USA                      | ECHO Cohort Study Site Co-Investigator                  | UG3OD035509 (Anne Marie Singh)                                                             |
| Judy L.                           | Aschner    |                       | MD               | Albert Einstein College of Medicine; Hackensack Meridian School of Medicine; Center for Discovery and Innovation | Bronx, New York, USA; Nutley, New Jersey, USA | ECHO Cohort Study Site Principal Investigator           | UH3OD023320 and UG3OD035546 (Judy Aschner), UG3OD035513 (Annemarie Stroustrup)             |
| Annemarie                         | Stroustrup |                       | MD, MPH          | Northwell Health, Cohen Children's Medical Center, and the Zucker School of Medicine at Hofstra / Northwell      | New Hyde Park, New York, USA                  | ECHO Cohort Study Site Principal Investigator           | UH3OD023320 (Judy Aschner), UG3OD035513 (Annemarie Stroustrup)                             |
| Stephanie L.                      | Merhar     |                       | MD, MS           | Cincinnati Children's                                                                                            | Cincinnati, Ohio, USA                         | ECHO Cohort Study Site Co-Investigator                  | UH3OD023320 (Judy Aschner), UG3OD035513 (Annemarie Stroustrup)                             |
| Paul E.                           | Moore      |                       | MD               | Vanderbilt University Medical Center                                                                             | Nashville, Tennessee, USA                     | ECHO Cohort Study Site Co-Investigator                  | UH3OD023320 (Judy Aschner), UG3OD035513 (Annemarie Stroustrup)                             |
| Gloria S.                         | Pryhuber   |                       | MD               | University of Rochester Medical Center                                                                           | Rochester, New York, USA                      | ECHO Cohort Study Site Co-Investigator                  | UH3OD023320 (Judy Aschner)                                                                 |
| Mark                              | Hudak      |                       | MD               | University of Florida College of Medicine                                                                        | Jacksonville, Florida, USA                    | ECHO Cohort Study Site Co-Investigator                  | UH3OD023320 (Judy Aschner)                                                                 |

## Supplemental Online Content: Nonauthor Collaborators

\*First name, last name, and suffix (if applicable) are required and will appear in PubMed.

| *First Name and Middle Initial(s) | *Last Name        | *Suffix (eg, Jr, III) | Academic Degrees | Institution                                                                                                 | Location (city, state/province, country) | Role or Contribution, eg, chair, principal investigator | Group (if more than 1 Group listed in the byline) and/or Subgroup (eg, Steering Committee) |
|-----------------------------------|-------------------|-----------------------|------------------|-------------------------------------------------------------------------------------------------------------|------------------------------------------|---------------------------------------------------------|--------------------------------------------------------------------------------------------|
| Ann Marie                         | Reynolds Lyndaker |                       | MD, MPH          | University of Buffalo Jacobs School of Medicine and Biomedical Sciences                                     | Buffalo, New York, USA                   | ECHO Cohort Study Site Co-Investigator                  | UH3OD023320 (Judy Aschner)                                                                 |
| Andrea L.                         | Lampland          |                       | MD               | Children's Minnesota                                                                                        | Minneapolis, Minnesota, USA              | ECHO Cohort Study Site Co-Investigator                  | UH3OD023320 (Judy Aschner)                                                                 |
| Burton                            | Rochelson         |                       | MD               | Northwell Health and the Zucker School of Medicine at Hofstra / Northwell                                   | New Hyde Park, New York, USA             | ECHO Cohort Study Site Principal Investigator           | UG3OD035532 (Annemarie Stroustrup)                                                         |
| Sophia                            | Jan               |                       | MD, MSHP         | Northwell Health, Cohen Children's Medical Center, and the Zucker School of Medicine at Hofstra / Northwell | New Hyde Park, New York, USA             | ECHO Cohort Study Site Co-Investigator                  | UG3OD035532 (Annemarie Stroustrup)                                                         |
| Matthew J.                        | Blitz             |                       | MD, MBA          | Northwell Health and the Zucker School of Medicine at Hofstra / Northwell                                   | New Hyde Park, New York, USA             | ECHO Cohort Study Site Co-Investigator                  | UG3OD035532 (Annemarie Stroustrup)                                                         |
| Michelle W.                       | Katzow            |                       | MD, MS           | Northwell Health, Cohen Children's Medical Center, and the Zucker School of Medicine at Hofstra / Northwell | New Hyde Park, New York, USA             | ECHO Cohort Study Site Co-Investigator                  | UG3OD035532 (Annemarie Stroustrup)                                                         |
| Zenobia                           | Brown             |                       | MD, MPH          | Northwell Health and the Zucker School of Medicine at Hofstra / Northwell                                   | New Hyde Park, New York, USA             | ECHO Cohort Study Site Co-Investigator                  | UG3OD035532 (Annemarie Stroustrup)                                                         |
| Codruta                           | Chiuzan           |                       | PhD              | Northwell Health, Feinstein Institutes for Medical Research                                                 | Manhasset, New York, USA                 | ECHO Cohort Study Site Co-Investigator                  | UG3OD035532 (Annemarie Stroustrup)                                                         |
| Timothy                           | Rafael            |                       | MD               | Northwell Health and the Zucker School of Medicine at Hofstra / Northwell                                   | New Hyde Park, New York, USA             | ECHO Cohort Study Site Co-Investigator                  | UG3OD035532 (Annemarie Stroustrup)                                                         |
| Dawnette                          | Lewis             |                       | MD, MPH          | Northwell Health and the Zucker School of Medicine at Hofstra / Northwell                                   | New Hyde Park, New York, USA             | ECHO Cohort Study Site Co-Investigator                  | UG3OD035532 (Annemarie Stroustrup)                                                         |

## Supplemental Online Content: Nonauthor Collaborators

\*First name, last name, and suffix (if applicable) are required and will appear in PubMed.

| *First Name and Middle Initial(s) | *Last Name      | *Suffix (eg, Jr, III) | Academic Degrees | Institution                                                               | Location (city, state/province, country) | Role or Contribution, eg, chair, principal investigator | Group (if more than 1 Group listed in the byline) and/or Subgroup (eg, Steering Committee) |
|-----------------------------------|-----------------|-----------------------|------------------|---------------------------------------------------------------------------|------------------------------------------|---------------------------------------------------------|--------------------------------------------------------------------------------------------|
| Natalie                           | Meiowitz        |                       | MD               | Northwell Health and the Zucker School of Medicine at Hofstra / Northwell | New Hyde Park, New York, USA             | ECHO Cohort Study Site Co-Investigator                  | UG3OD035532 (Annemarie Stroustrup)                                                         |
| Brenda                            | Poindexter      |                       | MD               | Children's Healthcare of Atlanta Emory University                         | Atlanta, Georgia, USA                    | ECHO Cohort Study Site Co-Investigator                  | UH3OD023320 (Judy Aschner)                                                                 |
| Tebeb                             | Gebretsadik     |                       | MPH              | Vanderbilt University Medical Center                                      | Nashville, Tennessee, USA                | ECHO Cohort Study Site Principal Investigator           | UG3OD035516 and UG3OD035517 (Tina Hartert)                                                 |
| Sarah                             | Osmundson       |                       | MD, MSC          | Vanderbilt University Medical Center                                      | Nashville, Tennessee, USA                | ECHO Cohort Study Site Principal Investigator           | UG3OD035517 (Tina Hartert)                                                                 |
| Jennifer K.                       | Straughen       |                       | PhD              | Henry Ford Health                                                         | Detroit, Michigan, USA                   | ECHO Cohort Study Site Principal Investigator           | UG3OD035518 (Jennifer Straughen)                                                           |
| Amy                               | Eapen           |                       | MD               | Henry Ford Health                                                         | Detroit, Michigan, USA                   | ECHO Cohort Study Site Principal Investigator           | UG3OD035518 (Jennifer Straughen)                                                           |
| Andrea                            | Cassidy-Bushrow |                       | PhD              | Henry Ford Health                                                         | Detroit, Michigan, USA                   | ECHO Cohort Study Site Co-Investigator                  | UG3/UH3OD023282 (James Gern)                                                               |
| Ganesa                            | Wegienka        |                       | PhD              | Henry Ford Health                                                         | Detroit, Michigan, USA                   | ECHO Cohort Study Site Co-Investigator                  | UG3/UH3OD023282 (James Gern)                                                               |
| Alex                              | Sitarik         |                       | MPH              | Henry Ford Health                                                         | Detroit, Michigan, USA                   | ECHO Cohort Study Site Biostatistician                  | UG3/UH3OD023282 (James Gern)                                                               |
| Kim                               | Woodcroft       |                       | PhD              | Henry Ford Health                                                         | Detroit, Michigan, USA                   | ECHO Cohort Study Site Co-Investigator                  | UG3OD035518 (Jennifer Straughen), UG3/UH3OD023282 (James Gern)                             |
| Audrey                            | Urquhart        |                       | MPH              | Henry Ford Health                                                         | Detroit, Michigan, USA                   | ECHO Cohort Study Site Epidemiologist                   | UG3OD035518 (Jennifer Straughen), UG3/UH3OD023282 (James Gern)                             |

## Supplemental Online Content: Nonauthor Collaborators

\*First name, last name, and suffix (if applicable) are required and will appear in PubMed.

| *First Name and Middle Initial(s) | *Last Name      | *Suffix (eg, Jr, III) | Academic Degrees | Institution                                                                  | Location (city, state/province, country) | Role or Contribution, eg, chair, principal investigator | Group (if more than 1 Group listed in the byline) and/or Subgroup (eg, Steering Committee) |
|-----------------------------------|-----------------|-----------------------|------------------|------------------------------------------------------------------------------|------------------------------------------|---------------------------------------------------------|--------------------------------------------------------------------------------------------|
| Albert                            | Levin           |                       | PhD              | Henry Ford Health                                                            | Detroit, Michigan, USA                   | ECHO Cohort Study Site Co-Investigator                  | UG3OD035518 (Jennifer Straughen)                                                           |
| Tisa                              | Johnson-Hooper  |                       | MD               | Henry Ford Health                                                            | Detroit, Michigan, USA                   | ECHO Cohort Study Site Co-Investigator                  | UG3OD035518 (Jennifer Straughen)                                                           |
| Brent                             | Davidson        |                       | MD               | Henry Ford Health                                                            | Detroit, Michigan, USA                   | ECHO Cohort Study Site Co-Investigator                  | UG3/UH3OD023282 (James Gern)                                                               |
| Tengfei                           | Ma              |                       | PhD              | Henry Ford Health                                                            | Detroit, Michigan, USA                   | ECHO Cohort Study Site Co-Investigator                  | UG3OD035518 (Jennifer Straughen)                                                           |
| Emily S.                          | Barrett         |                       | PhD              | Environmental and Occupational Health Sciences Institute, Rutgers University | Piscataway, New Jersey, USA              | ECHO Cohort Study Site Principal Investigator           | UG3OD035527 (Emily S Barrett)                                                              |
| Martin J.                         | Blaser          |                       | MD               | Rutgers University                                                           | Piscataway, New Jersey, USA              | ECHO Cohort Study Site Principal Investigator           | UG3OD035527 (Emily S Barrett)                                                              |
| Maria Gloria                      | Dominguez-Bello |                       | PhD              | Rutgers University                                                           | New Brunswick, New Jersey, USA           | ECHO Cohort Study Site Principal Investigator           | UG3OD035527 (Emily S Barrett)                                                              |
| Daniel B.                         | Horton          |                       | MD               | Robert Wood Johnson Medical School, Rutgers University                       | New Brunswick, New Jersey, USA           | ECHO Cohort Study Site Principal Investigator           | UG3OD035527 (Emily S Barrett)                                                              |
| Manuel                            | Jimenez         |                       | MD               | Robert Wood Johnson Medical School, Rutgers University                       | New Brunswick, New Jersey, USA           | ECHO Cohort Study Site Principal Investigator           | UG3OD035527 (Emily S Barrett)                                                              |
| Todd                              | Rosen           |                       | MD               | Robert Wood Johnson Medical School, Rutgers University                       | New Brunswick, New Jersey, USA           | ECHO Cohort Study Site Co-Investigator                  | UG3OD035527 (Emily S Barrett)                                                              |
| Kristy                            | Palomares       |                       | MD, PhD          | Saint Peter's University Hospital                                            | New Brunswick, New Jersey, USA           | ECHO Cohort Study Site Co-Investigator                  | UG3OD035527 (Emily S Barrett)                                                              |
| Lyndsay A.                        | Avalos          |                       | PhD, MPH         | Kaiser Permanente Northern California                                        | Oakland, California, USA                 | ECHO Cohort Study Site Principal Investigator           | UG3OD035540 (Monique Marie Hedderson)                                                      |

## Supplemental Online Content: Nonauthor Collaborators

\*First name, last name, and suffix (if applicable) are required and will appear in PubMed.

| *First Name and Middle Initial(s) | *Last Name | *Suffix (eg, Jr, III) | Academic Degrees | Institution                                                                                 | Location (city, state/province, country) | Role or Contribution, eg, chair, principal investigator | Group (if more than 1 Group listed in the byline) and/or Subgroup (eg, Steering Committee) |
|-----------------------------------|------------|-----------------------|------------------|---------------------------------------------------------------------------------------------|------------------------------------------|---------------------------------------------------------|--------------------------------------------------------------------------------------------|
| Yeyi                              | Zhu        |                       | PhD, MS          | Kaiser Permanente Northern California                                                       | Oakland, California, USA                 | ECHO Cohort Study Site Principal Investigator           | UG3OD035540 (Monique Marie Hedderson)                                                      |
| Kelly J .                         | Hunt       |                       | PhD              | Medical University of South Carolina                                                        | Charleston, South Carolina, USA          | ECHO Cohort Study Site Principal Investigator           | UG3OD035543 (Kelly J Hunt)                                                                 |
| Roger B.                          | Newman     |                       | MD               | Medical University of South Carolina                                                        | Charleston, South Carolina, USA          | ECHO Cohort Study Site Principal Investigator           | UG3OD035543 (Kelly J Hunt)                                                                 |
| Michael S.                        | Bloom      |                       | PhD              | George Mason University                                                                     | Fairfax, Virginia, USA                   | ECHO Cohort Study Site Principal Investigator           | UG3OD035543 (Kelly J Hunt)                                                                 |
| Mallory H.                        | Alkis      |                       | MD               | Medical University of South Carolina                                                        | Charleston, South Carolina, USA          | ECHO Cohort Study Site Co-Investigator                  | UG3OD035543 (Kelly J Hunt)                                                                 |
| James R.                          | Roberts    |                       | MD, MPH          | Medical University of South Carolina                                                        | Charleston, South Carolina, USA          | ECHO Cohort Study Site Co-Investigator                  | UG3OD035543 (Kelly J Hunt)                                                                 |
| Sunni L.                          | Mumford    |                       | PhD              | University of Pennsylvania Perelman School of Medicine                                      | Philadelphia, Pennsylvania, USA          | ECHO Cohort Study Site Principal Investigator           | UG3OD035537 (Sunni L Mumford)                                                              |
| Heather H.                        | Burris     |                       | MD, MPH          | Children's Hospital of Philadelphia; University of Pennsylvania Perelman School of Medicine | Philadelphia, Pennsylvania, USA          | ECHO Cohort Study Site Principal Investigator           | UG3OD035537 (Sunni L Mumford)                                                              |
| Sara B.                           | DeMauro    |                       | MD, MSCE         | Children's Hospital of Philadelphia; University of Pennsylvania Perelman School of Medicine | Philadelphia, Pennsylvania, USA          | ECHO Cohort Study Site Principal Investigator           | UG3OD035537 (Sunni L Mumford)                                                              |
| Lynn M.                           | Yee        |                       | MD, MPH          | Feinberg School of Medicine, Northwestern University                                        | Chicago, Illinois, USA                   | ECHO Cohort Study Site Principal Investigator           | UG3OD035546 (Judy Aschner)                                                                 |

## Supplemental Online Content: Nonauthor Collaborators

\*First name, last name, and suffix (if applicable) are required and will appear in PubMed.

| *First Name and Middle Initial(s) | *Last Name | *Suffix (eg, Jr, III) | Academic Degrees | Institution                                                                                     | Location (city, state/province, country) | Role or Contribution, eg, chair, principal investigator | Group (if more than 1 Group listed in the byline) and/or Subgroup (eg, Steering Committee) |
|-----------------------------------|------------|-----------------------|------------------|-------------------------------------------------------------------------------------------------|------------------------------------------|---------------------------------------------------------|--------------------------------------------------------------------------------------------|
| Aaron                             | Hamvas     |                       | MD               | Ann & Robert H. Lurie Children's Hospital, Feinberg School of Medicine, Northwestern University | Chicago, Illinois, USA                   | ECHO Cohort Study Site Principal Investigator           | UG3OD035546 (Judy Aschner)                                                                 |
| Antonia F.                        | Olidipo    |                       | MD, MSCI         | Hackensack University Medical Center, Hackensack Meridian School of Medicine                    | Nutley, New Jersey, USA                  | ECHO Cohort Study Site Co-Investigator                  | UG3OD035546 (Judy Aschner)                                                                 |
| Andrew S.                         | Haddad     |                       | MD               | Hackensack University Medical Center, Hackensack Meridian School of Medicine                    | Nutley, New Jersey, USA                  | ECHO Cohort Study Site Co-Investigator                  | UG3OD035546 (Judy Aschner)                                                                 |
| Lisa R.                           | Eiland     |                       | MD               | Hackensack University Medical Center, Hackensack Meridian School of Medicine                    | Nutley, New Jersey, USA                  | ECHO Cohort Study Site Co-Investigator                  | UG3OD035546 (Judy Aschner)                                                                 |
| Nicole T.                         | Spillane   |                       | MD               | Hackensack University Medical Center, Hackensack Meridian School of Medicine                    | Nutley, New Jersey, USA                  | ECHO Cohort Study Site Co-Investigator                  | UG3OD035546 (Judy Aschner)                                                                 |
| Kirin N.                          | Suri       |                       | MD               | Hackensack University Medical Center, Hackensack Meridian School of Medicine                    | Nutley, New Jersey, USA                  | ECHO Cohort Study Site Co-Investigator                  | UG3OD035546 (Judy Aschner)                                                                 |
| Stephanie A.                      | Fisher     |                       | MD, MPH          | Feinberg School of Medicine, Northwestern University                                            | Chicago, Illinois, USA                   | ECHO Cohort Study Site Co-Investigator                  | UG3OD035546 (Judy Aschner)                                                                 |
| Jeffrey A.                        | Goldstein  |                       | MD, PhD          | Feinberg School of Medicine, Northwestern University                                            | Chicago, Illinois, USA                   | ECHO Cohort Study Site Co-Investigator                  | UG3OD035546 (Judy Aschner)                                                                 |
| Leena B.                          | Mithal     |                       | MD               | Ann & Robert H. Lurie Children's Hospital, Feinberg School of Medicine, Northwestern University | Chicago, Illinois, USA                   | ECHO Cohort Study Site Co-Investigator                  | UG3OD035546 (Judy Aschner)                                                                 |
| Raye-Ann O.                       | DeRegnier  |                       | MD               | Ann & Robert H. Lurie Children's Hospital, Feinberg School of Medicine, Northwestern University | Chicago, Illinois, USA                   | ECHO Cohort Study Site Co-Investigator                  | UG3OD035546 (Judy Aschner)                                                                 |

## Supplemental Online Content: Nonauthor Collaborators

\*First name, last name, and suffix (if applicable) are required and will appear in PubMed.

| *First Name and Middle Initial(s) | *Last Name | *Suffix (eg, Jr, III) | Academic Degrees | Institution                                                       | Location (city, state/province, country)          | Role or Contribution, eg, chair, principal investigator | Group (if more than 1 Group listed in the byline) and/or Subgroup (eg, Steering Committee) |
|-----------------------------------|------------|-----------------------|------------------|-------------------------------------------------------------------|---------------------------------------------------|---------------------------------------------------------|--------------------------------------------------------------------------------------------|
| Nathalie L.                       | Maitre     |                       | MD, PhD          | Emory University School of Medicine and Cerebral Palsy Foundation | Atlanta, Georgia, USA and New York, New York, USA | ECHO Cohort Study Site Co-Investigator                  | UG3OD035546 (Judy Aschner)                                                                 |
| Ruby H.N.                         | Nguyen     |                       | PhD, MHS         | School of Public Health, University of Minnesota                  | Minneapolis, Minnesota, USA                       | ECHO award Principal Investigator                       | UG3OD035529 (Hong-Ngoc Nguyen)                                                             |
| Meghan M.                         | JaKa       |                       | PhD, MS          | HealthPartners Institute                                          | Minneapolis, Minnesota, USA                       | ECHO site Principal Investigator                        | UG3OD035529 (Hong-Ngoc Nguyen)                                                             |
| Abbey C.                          | Sidebottom |                       | PhD, MPH         | Allina Health                                                     | Minneapolis, Minnesota, USA                       | ECHO site Principal Investigator                        | UG3OD035529 (Hong-Ngoc Nguyen)                                                             |
| Michael J.                        | Paidas     |                       | MD               | University of Miami Miller School of Medicine                     | Miami, Florida, USA                               | ECHO site Principal Investigator                        | UG3OD035542 (Hudson Santos)                                                                |
| JoNell E.                         | Potter     |                       | APRN, PhD        | University of Miami Miller School of Medicine                     | Miami, Florida, USA                               | ECHO Cohort Study Site Co-Investigator                  | UG3OD035542 (Hudson Santos)                                                                |
| Natale                            | Ruby       |                       | PhD, PsyD        | University of Miami Miller School of Medicine                     | Miami, Florida, USA                               | ECHO Cohort Study Site Co-Investigator                  | UG3OD035542 (Hudson Santos)                                                                |
| Lunthita                          | Duthely    |                       | EdD              | University of Miami School of Medicine                            | Miami, Florida, USA                               | ECHO Cohort Study Site Co-Investigator                  | UG3OD035542 (Hudson Santos)                                                                |
| Arumugam                          | Jayakumar  |                       | PhD              | University of Miami Miller School of Medicine                     | Miami, Florida, USA                               | ECHO Cohort Study Site Co-Investigator                  | UG3OD035542 (Hudson Santos)                                                                |
| Karen                             | Young      |                       | MD               | University of Miami Miller School of Medicine                     | Miami, Florida, USA                               | ECHO Cohort Study Site Co-Investigator                  | UG3OD035542 (Hudson Santos)                                                                |
| Isabel                            | Maldonado  |                       | MPH, BS          | University of Miami                                               | Miami, Florida, USA                               | ECHO Cohort Study Site Program Director                 | UG3OD035542 (Hudson Santos)                                                                |
| Meghan                            | Miller     |                       | PhD              | University of California Davis                                    | Sacramento, California, USA                       | ECHO Cohort Study Site Co-Investigator                  | UG3OD035550 (Rebecca Schmidt)                                                              |
| Jonathan L.                       | Slaughter  |                       | MD, MPH          | Nationwide Children's Hospital and The Ohio State University      | Columbus, Ohio, USA                               | ECHO Cohort Study Site Principal Investigator           | UG3OD035536 (Jonathan Slaughter)                                                           |

## Supplemental Online Content: Nonauthor Collaborators

\*First name, last name, and suffix (if applicable) are required and will appear in PubMed.

| *First Name and Middle Initial(s) | *Last Name      | *Suffix (eg, Jr, III) | Academic Degrees | Institution                                                                                     | Location (city, state/province, country) | Role or Contribution, eg, chair, principal investigator | Group (if more than 1 Group listed in the byline) and/or Subgroup (eg, Steering Committee) |
|-----------------------------------|-----------------|-----------------------|------------------|-------------------------------------------------------------------------------------------------|------------------------------------------|---------------------------------------------------------|--------------------------------------------------------------------------------------------|
| Sarah A.                          | Keim            |                       | PhD, MS, MA      | Nationwide Children's Hospital and The Ohio State University                                    | Columbus, Ohio, USA                      | ECHO Cohort Study Site Principal Investigator           | UG3OD035536 (Jonathan Slaughter)                                                           |
| Courtney D.                       | Lynch           |                       | PhD, MPH         | The Ohio State University                                                                       | Columbus, Ohio, USA                      | ECHO Cohort Study Site Principal Investigator           | UG3OD035536 (Jonathan Slaughter)                                                           |
| Kartik K.                         | Venkatesh       |                       | MD, PhD          | The Ohio State University                                                                       | Columbus, Ohio, USA                      | ECHO Cohort Study Site Principal Investigator           | UG3OD035536 (Jonathan Slaughter)                                                           |
| Kristina W.                       | Whitworth       |                       | PhD              | Baylor College of Medicine                                                                      | Houston, Texas, USA                      | ECHO Cohort Study Site Principal Investigator           | UG3OD035544 (Kristina Whitworth)                                                           |
| Elaine                            | Symanski        |                       | PhD              | Baylor College of Medicine                                                                      | Houston, Texas, USA                      | ECHO Cohort Study Site Principal Investigator           | UG3OD035544 (Kristina Whitworth)                                                           |
| Thomas F.                         | Northrup        |                       | PhD              | University of Texas Health Science Center at Houston (UTHealth Houston) McGovern Medical School | Houston, Texas, USA                      | ECHO Cohort Study Site Principal Investigator           | UG3OD035544 (Kristina Whitworth)                                                           |
| Hector                            | Mendez-Figueroa |                       | MD               | University of Texas Health Science Center at Houston (UTHealth Houston) McGovern Medical School | Houston, Texas, USA                      | ECHO Cohort Study Site Co-Investigator                  | UG3OD035544 (Kristina Whitworth)                                                           |
| Ricardo A.                        | Mosquera        |                       | MD               | University of Texas Health Science Center at Houston (UTHealth Houston) McGovern Medical School | Houston, Texas, USA                      | ECHO Cohort Study Site Co-Investigator                  | UG3OD035544 (Kristina Whitworth)                                                           |
| Margaret R.                       | Karagas         |                       | PhD              | Geisel School of Medicine at Dartmouth                                                          | Hanover, New Hampshire, USA              | ECHO Cohort Study Site Principal Investigator           | UG3/UH3OD023275 (Margaret Karagas)                                                         |

## Supplemental Online Content: Nonauthor Collaborators

\*First name, last name, and suffix (if applicable) are required and will appear in PubMed.

| *First Name and Middle Initial(s) | *Last Name | *Suffix (eg, Jr, III) | Academic Degrees | Institution                                                                                 | Location (city, state/province, country)             | Role or Contribution, eg, chair, principal investigator | Group (if more than 1 Group listed in the byline) and/or Subgroup (eg, Steering Committee) |
|-----------------------------------|------------|-----------------------|------------------|---------------------------------------------------------------------------------------------|------------------------------------------------------|---------------------------------------------------------|--------------------------------------------------------------------------------------------|
| Juliette C.                       | Madan      |                       | MD, MS           | Geisel School of Medicine at Dartmouth, Dartmouth Hitchcock Medical Center                  | Hanover, New Hampshire, USA                          | ECHO Cohort Study Site Principal Investigator           | UG3/UH3OD023275 (Margaret Karagas)                                                         |
| Debra M.                          | MacKenzie  |                       | PhD              | College of Pharmacy, University of New Mexico Health Sciences Center                        | Albuquerque, New Mexico, USA                         | ECHO Cohort Study Site Principal Investigator           | UG3/UH3OD023344 (Debra MacKenzie)                                                          |
| Johnnye L.                        | Lewis      |                       | PhD              | College of Pharmacy, University of New Mexico Health Sciences Center                        | Albuquerque, New Mexico, USA                         | ECHO Cohort Study Site Principal Investigator           | UG3/UH3OD023344 (Debra MacKenzie)                                                          |
| Brandon J.                        | Rennie     |                       | PhD              | University of New Mexico                                                                    | Albuquerque, New Mexico, USA                         | ECHO Cohort Study Site Co-Investigator                  | UG3/UH3OD023344 (Debra MacKenzie)                                                          |
| Bennett L.                        | Leventhal  |                       | MD               | College of Pharmacy, University of New Mexico Health Sciences Center; University of Chicago | Albuquerque, New Mexico, USA; Chicago, Illinois, USA | ECHO Cohort Study Site Co-Investigator                  | UG3/UH3OD023344 (Debra MacKenzie)                                                          |
| Young Shin                        | Kim        |                       | MD, MS, MPH, PhD | University of California, San Francisco                                                     | San Francisco, California, USA                       | ECHO Cohort Study Site Co-Investigator                  | UG3/UH3OD023344 (Debra MacKenzie)                                                          |
| Somer                             | Bishop     |                       | PhD              | University of California, San Francisco                                                     | San Francisco, California, USA                       | ECHO Cohort Study Site Co-Investigator                  | UG3/UH3OD023344 (Debra MacKenzie)                                                          |
| Sara S.                           | Nozadi     |                       | PhD              | College of Pharmacy, University of New Mexico Health Sciences Center                        | Albuquerque, New Mexico, USA                         | ECHO Cohort Study Site Co-Investigator                  | UG3/UH3OD023344 (Debra MacKenzie)                                                          |
| Li                                | Luo        |                       | PhD              | Comprehensive Cancer Center, University of New Mexico Health Sciences Center                | Albuquerque, New Mexico, USA                         | ECHO Cohort Study Site Co-Investigator                  | UG3/UH3OD023344 (Debra MacKenzie)                                                          |
| Barry M.                          | Lester     |                       | PhD              | Warren Alpert Medical School of Brown University                                            | Providence, Rhode Island, USA                        | ECHO Cohort Study Site Principal Investigator           | UH3OD023347 (Barry Lester)                                                                 |
| Carmen J.                         | Marsit     |                       | PhD              | Rollins School of Public Health, Emory University                                           | Atlanta, Georgia, USA                                | ECHO Cohort Study Site Principal Investigator           | UH3OD023347 (Barry Lester)                                                                 |

## Supplemental Online Content: Nonauthor Collaborators

\*First name, last name, and suffix (if applicable) are required and will appear in PubMed.

| *First Name and Middle Initial(s) | *Last Name | *Suffix (eg, Jr, III) | Academic Degrees | Institution                                                                                              | Location (city, state/province, country) | Role or Contribution, eg, chair, principal investigator | Group (if more than 1 Group listed in the byline) and/or Subgroup (eg, Steering Committee) |
|-----------------------------------|------------|-----------------------|------------------|----------------------------------------------------------------------------------------------------------|------------------------------------------|---------------------------------------------------------|--------------------------------------------------------------------------------------------|
| Todd                              | Everson    |                       | PhD              | Rollins School of Public Health, Emory University                                                        | Atlanta, Georgia, USA                    | ECHO Cohort Study Site Principal Investigator           | UH3OD023347 (Barry Lester)                                                                 |
| Cynthia M.                        | Loncar     |                       | PhD              | Warren Alpert Medical School of Brown University                                                         | Providence, Rhode Island, USA            | ECHO Cohort Study Site Principal Investigator           | UH3OD023347 (Barry Lester)                                                                 |
| Elisabeth C.                      | McGowan    |                       | MD               | Warren Alpert Medical School of Brown University                                                         | Providence, Rhode Island, USA            | ECHO Cohort Study Site Principal Investigator           | UH3OD023347 (Barry Lester)                                                                 |
| Stephen J.                        | Sheinkopf  |                       | PhD              | Thompson Center for Autism & Neurodevelopment, University of Missouri                                    | Columbia, Missouri, USA                  | ECHO Cohort Study Site Principal Investigator           | UH3OD023347 (Barry Lester)                                                                 |
| Brian S.                          | Carter     |                       | MD               | Children's Mercy-Kansas City                                                                             | Kansas City, Missouri, USA               | ECHO Cohort Study Site Principal Investigator           | UH3OD023347 (Barry Lester)                                                                 |
| Jennifer                          | Check      |                       | MD               | Wake Forest School of Medicine                                                                           | Winston, Salem North Carolina, USA       | ECHO Cohort Study Site Principal Investigator           | UH3OD023347 (Barry Lester)                                                                 |
| Jennifer B.                       | Helderman  |                       | MD               | Wake Forest School of Medicine                                                                           | Winston, Salem North Carolina, USA       | ECHO Cohort Study Site Principal Investigator           | UH3OD023347 (Barry Lester)                                                                 |
| Charles R.                        | Neal       |                       | MD               | University of Hawaii John A Burns School of Medicine                                                     | Honolulu, Hawaii, USA                    | ECHO Cohort Study Site Principal Investigator           | UH3OD023347 (Barry Lester)                                                                 |
| Lynne M.                          | Smith      |                       | MD               | UCLA Clinical and Translational Science Institute at The Lundquist Institute, Harbor-UCLA Medical Center | Los Angeles, California, USA             | ECHO Cohort Study Site Principal Investigator           | UH3OD023347 (Barry Lester)                                                                 |
