# Supplementary material for: Prenatal Diet and Infant Growth From Birth to Age 24 Months
Source: PubMed Central journal article supplement (PMC11582932; doi:10.1001/jamanetworkopen.2024.45771), 2024-11-21
Supplement: jamanetwopen-e2445771-s003.pdf [file jamanetwopen-e2445771-s003.pdf]

## Data Sharing Statement

Hedderson. Prenatal Diet and Infant Growth From Birth to Age 24 Months. *JAMA Netw Open*.  
Published November 21, 2024. doi:10.1001/jamanetworkopen.2024.45771

### Data

**Data available:** No
